1 **Massively parallel, time-resolved single-cell RNA sequencing with scNT-Seq**

2 Qi Qiu<sup>1,2,#</sup>, Peng Hu<sup>1,2,#</sup>, Kiya W. Govek<sup>1,3</sup>, Pablo G. Camara<sup>1,3</sup>, Hao Wu<sup>1,2,\*</sup>

3 <sup>1</sup>Department of Genetics, University of Pennsylvania, Philadelphia, PA 19104

4 <sup>2</sup>Penn Epigenetics Institute, University of Pennsylvania, Philadelphia, PA 19104

5 <sup>3</sup>Institute of Biomedical Informatics, University of Pennsylvania, Philadelphia, PA 19104

6

7

8 #These authors contributed equally to this work

9 \*Correspondence should be addressed to H.W. (haowu2@penmedicine.upenn.edu).

10

11 **ABSTRACT**

12 Single-cell RNA sequencing offers snapshots of whole transcriptomes but obscures the temporal  
13 dynamics of RNA biogenesis and decay. Here we present single-cell nascent transcript tagging  
14 sequencing (scNT-Seq), a method for massively parallel analysis of nascent and pre-existing RNAs from  
15 the same cell. This droplet microfluidics-based method enables high-throughput chemical conversion on  
16 barcoded beads, efficiently marking metabolically labeled nascent transcripts with T-to-C substitutions. By  
17 simultaneously measuring nascent and pre-existing transcriptomes, scNT-Seq reveals neuronal subtype-  
18 specific gene regulatory networks and time-resolved RNA trajectories in response to brief (minutes)  
19 versus sustained (hours) neuronal activation. Integrating scNT-Seq with genetic perturbation reveals that  
20 DNA methylcytosine dioxygenases may inhibit stepwise transition from pluripotent embryonic stem cell  
21 state to intermediate and totipotent two-cell-embryo-like (2C-like) states by promoting global nascent  
22 transcription. Furthermore, pulse-chase scNT-Seq enables transcriptome-wide measurements of RNA  
23 stability in rare 2C-like cells. Time-resolved single-cell transcriptomic analysis thus opens new lines of  
24 inquiry regarding cell-type-specific RNA regulatory mechanisms.

## 25 INTRODUCTION

26 Dynamic changes in RNA levels are regulated by the interplay of RNA transcription, processing, and  
27 degradation<sup>1, 2</sup>. Understanding the mechanisms by which the transcriptome is regulated in functionally  
28 diverse cell-types within multi-cellular organisms thus requires cell-type-specific measurements of the  
29 kinetics of RNA biogenesis and decay. Recent advances in single-cell RNA sequencing (scRNA-Seq)  
30 technologies are leading to a more complete understanding of heterogeneity in cell types and states<sup>3</sup>.  
31 However, standard scRNA-Seq methods capture a mixture of newly synthesized and pre-existing RNAs  
32 without being able to directly reveal nascent RNA dynamics.

33 Accurately capturing changes in the nascent transcriptome over time at single-cell resolution is of  
34 particular interest because measuring nascent RNAs can reveal immediate regulatory changes in  
35 response to developmental, environmental, metabolic, and pathological signals<sup>4</sup>. Commonly used  
36 approaches for distinguishing nascent from pre-existing RNAs of the same population of transcripts rely  
37 on metabolic labeling that employs thiol-labeled nucleoside analogs such as 4-thiouridine (4sU) and  
38 subsequent biochemical enrichment of metabolically labeled RNAs<sup>2</sup>. Although these methods have  
39 yielded unprecedented insights into the regulation of RNA dynamics, they require ample starting material  
40 and present challenges for enrichment normalization. Several approaches have recently been developed  
41 to chemically convert 4sU into cytidine analogs, yielding uracil-to-cytosine (U-to-C) substitutions that label  
42 nascent RNAs after reverse transcription<sup>5-7</sup>. These chemical nucleotide conversion methods allow for  
43 direct measurement of temporal information about cellular RNAs in a sequencing experiment without  
44 biochemical enrichment. Recent studies integrated standard plate-based single-cell RNA-Seq method  
45 with one of these chemical methods (i.e. thiol(SH)-linked alkylation for the metabolic sequencing of RNA  
46 (SLAM)-Seq)<sup>8, 9</sup>, demonstrating the feasibility of studying nascent transcriptomes at single-cell levels.  
47 However, these plate-based single-cell SLAM-Seq methods suffer from several limitations. First, they are  
48 costly, and the associated library preparation steps are time-consuming, prohibiting it for large-scale  
49 single-cell analysis of highly heterogeneous cell populations. Second, these methods lack unique  
50 molecular identifiers (UMIs), preventing accurate quantification of the nascent transcript levels.

51 To overcome these constraints, we developed single-cell nascent transcript tagging sequencing (scNT-  
52 Seq), a high-throughput and UMI-based nascent scRNA-Seq approach. In scNT-Seq, integration of  
53 metabolic RNA labeling, droplet microfluidics, and chemically induced recoding of 4sU to cytosine analog  
54 permits highly scalable and time-resolved single-cell analysis of cellular RNA dynamics. We demonstrate  
55 that the method is easy to set up and substantially improves the time and cost associated with  
56 simultaneous single-cell analysis of nascent and pre-existing transcriptomes. We show scNT-Seq enables  
57 more detailed characterization of gene regulatory networks and temporal RNA trajectories than single-cell  
58 whole-transcriptome measurements alone.

59

## 60 RESULTS

61 **Development and validation of scNT-Seq.** To enable nascent and pre-existing transcripts from the  
62 same cell to be analyzed in a scalable manner, we focused on the Drop-Seq platform because its unique  
63 barcoded bead design affords both immobilization of RNAs for efficient chemical conversion reactions  
64 and UMI-based high-throughput scRNA-Seq analysis, and this droplet microfluidics platform has been  
65 widely adopted<sup>10-14</sup>. The scNT-Seq consists of the following key steps (**Fig. 1a**): (1) metabolically labeling  
66 of cells with 4sU for a temporally defined time period; (2-3) co-encapsulating each individual cell with a  
67 barcoded oligo-dT primer coated bead in a nanoliter-scale droplet which captures both nascent and pre-  
68 existing RNAs; (4) performing 4sU chemical conversion on pooled barcoded beads in one reaction after  
69 droplet breakage; (5-8) reverse transcription, cDNA amplification, tagmentation, indexing PCR, and  
70 sequencing; and (9) using a UMI-based statistical model to analyze T-to-C substitutions within transcripts  
71 and infer the nascent transcript fraction at single-cell level.

72 To identify the optimal reaction conditions on barcoded beads, we first explored two independent  
73 chemical conversion methods (TimeLapse-Seq: 2,2,2-trifluoroethylamine (TFEA)/sodium periodate  
74 (NaIO<sub>4</sub>)-based 4sU conversion; SLAM-Seq: iodoacetamide (IAA)-based conversion) and validated their  
75 performance with species-mixing experiments using cultured mouse embryonic stem cells (mESCs) and  
76 human K562 cells. This analysis indicates that TFEA/NaIO<sub>4</sub>-based scNT-Seq substantially outperforms  
77 the IAA-based assay in terms of mRNA recovery rates (**Fig. 1b**). Furthermore, the collision rate is  
78 comparable between TFEA/NaIO<sub>4</sub>-based scNT-Seq and standard Drop-Seq (**Fig. 1b**), demonstrating the  
79 specificity of scNT-Seq in analyzing single-cell transcriptomes. Shallow sequencing of mESCs under  
80 different treatment conditions showed that TFEA/NaIO<sub>4</sub>-based scNT-Seq identified a similar number of  
81 genes or UMIs per cell compared to standard Drop-Seq (**Supplementary Fig. 1a**). Aggregated single-cell  
82 nascent or pre-existing transcriptomes were highly correlated between replicates (**Supplementary Fig.**  
83 **1b**). Further analysis of K562 cells revealed that only 4sU labeling and TFEA/NaIO<sub>4</sub> treatment resulted in  
84 a substantial increase in T-to-C substitution (**Fig. 1c**) and in UMIs that contained one or more such  
85 substitutions (**Fig. 1d, e**). Notably, TFEA/NaIO<sub>4</sub> chemical treatment works efficiently with both freshly  
86 isolated and cryo-preserved (methanol-fixed) cells (**Supplementary Fig. 1c**), demonstrating the versatility  
87 of scNT-Seq. Collectively, these data indicate that TFEA/NaIO<sub>4</sub>-based scNT-Seq is capable of efficiently  
88 detecting nascent transcripts at single-cell resolution.

89

## 90 **Application of scNT-Seq to study neuronal activity-dependent nascent transcription and** 91 **regulatory networks.**

92 Neuronal activity induces expression of hundreds of activity-regulated genes (ARGs) in the vertebrate  
93 brain, leading to new protein synthesis and epigenetic changes necessary for short- and long-term  
94 memories of experiences. Thus, the coupling of synaptic activity to nascent transcription in the nucleus  
95 allows neurons to both respond dynamically to their immediate environment, and to store information

96 stably<sup>15</sup>. Recent studies suggest that different patterns of neuronal activity could induce a distinct set of  
97 ARGs<sup>16</sup>. To investigate cell-type-specific nascent transcription in response to distinct activity-duration  
98 patterns (brief versus sustained stimulation), we applied scNT-Seq to primary cortical neuronal cultures,  
99 derived from mouse cortex (embryonic day 16 (E16)), which contains heterogeneous populations of  
100 neuronal subtypes and undifferentiated neural progenitor cells.

101 To detect activity-regulated nascent transcriptional responses, we metabolically labeled primary mouse  
102 cortical cultures (200  $\mu$ M 4sU) for two hours and stimulated the cells with different durations of neuronal  
103 activity (0, 15, 30, 60 and 120 min of potassium chloride (KCl)-mediated membrane depolarization) (**Fig.**  
104 **2a**). After filtering low-quality cells and potential doublets, we retained 20,547 single-cell transcriptomes  
105 from five time-points (**Fig. 2b** and **Supplementary Table 1**). After sample integration, principal  
106 component analysis (PCA), graph-based clustering, and visualization by Uniform Manifold Approximation  
107 and Projection (UMAP), we identified nine major cell-types based on known marker genes: *Neurod6*+  
108 cortical excitatory neurons (Ex, 68.5%), four *Gad1*+ inhibitory neuronal subtypes (Inh1-4, 13.9% in total),  
109 *Dlx1/Dlx2*+ inhibitory neuronal precursors (Inh-NP: 1.7%), two sub-populations of *Nes/Sox2*+ excitatory  
110 neuronal precursors (Ex-NP1/2: 10.4% in total), and *Nes/Aldh111*+ radial glia (RG: 5.5%) (**Fig. 2b** and  
111 **Supplementary Fig. 2b, c**).

112 We next sought to distinguish nascent from pre-existing RNAs by counting and statistically modeling T-to-  
113 C substitutions in transcripts (UMIs), an approach that overcomes the problem of incomplete 4sU labeling  
114 of nascent transcripts (up to 50% of all reads originated from new RNAs may not contain T-to-C  
115 substitutions)<sup>17</sup>. The quantification accuracy is further improved by UMI-based analysis, which  
116 substantially increases the number of uridines or T-to-C substitutions covered in each transcript  
117 compared to the analysis of individual sequencing reads (**Supplementary Fig. 3a, b**). After statistical  
118 correction, we obtained reliable measurements of nascent RNA fraction for both activity-induced genes  
119 (e.g., *Fos*, ~90% nascent/total) and slow turnover house-keeping genes (e.g., *Mapt*, <5% nascent/total) in  
120 excitatory neurons (**Supplementary Fig. 3c, d**).

121 Furthermore, sub-clustering of nascent (upper) or pre-existing (lower) transcriptomes derived from  
122 randomly sampled excitatory neurons could readily separate nascent, but not pre-existing single-cell  
123 transcriptomes in an activity-pattern dependent manner (right panels in **Fig. 2b**). In contrast, nascent  
124 transcriptomes of undifferentiated excitatory neural precursors (Ex-NP/RG) did not exhibit similar  
125 distributions (**Supplementary Fig. 4a**). Next, we directly examined how nascent transcription of classic  
126 ARGs are induced in different cell-types in response to distinct activity-patterns. While some ARGs, such  
127 as *Jun* and *Btg2*, were specifically induced in Ex neurons upon activation, other ARGs (e.g., *Egr1*, *Fos*,  
128 and *Npas4*), were broadly induced in many cell-types including non-neuronal cells, albeit with different  
129 magnitudes and response curves (**Fig. 2c**, **Supplementary Fig. 4b**). There was little to no change at pre-  
130 existing levels upon activation of Ex neurons (**Fig. 2c**). Together, these results suggest single-cell



131 nascent transcriptome analysis by scNT-Seq can accurately detect cell-type-specific, activity-induced  
132 changes in nascent transcription within the timescale of minutes to hours.

133 Recent advances in computational analysis enable identification of specific gene regulatory networks  
134 (GRNs, also known as regulon of a transcription factor (TF)) underlying stable cell states by linking *cis*-  
135 regulatory sequences to single-cell gene expression. Since the regulon is scored as a whole, instead of  
136 using the expression of individual genes, this approach is more robust against experimental dropouts or  
137 stochastic variation of gene expression due to transcriptional bursting. We reasoned that applying such  
138 an approach to nascent transcriptomes derived from scNT-Seq may allow for analysis of regulons  
139 underlying dynamic cell states induced by external stimuli such as neuronal activity. By applying single-  
140 cell regulatory network inference and clustering (SCENIC)<sup>18</sup> to statistically-corrected nascent and pre-  
141 existing single-cell transcriptomes, we identified 79 regulons with significant *cis*-regulatory motif  
142 enrichment showing significant changes in response to at least one activity-pattern (**Fig. 2d**,  
143 **Supplementary Fig. 5**). Many early-response ARGs encode TFs that regulate a subsequent wave of  
144 late-response gene expression. SCENIC analysis of nascent transcriptomes revealed neuronal activity-  
145 dependent increase in TF regulon activity of well-established IEG TFs (e.g., Fos, Jun, and Egr family of  
146 TFs) as well as constitutively expressed TFs such as Srf and Mef2, both of which are activated by  
147 multiple calcium-dependent signaling pathways and undergo post-translational modifications (e.g.,  
148 phosphorylation) in response to neuronal activity (**Fig. 2d**). Thus, these TFs represent a group of TFs that  
149 are the main mediator of activity-dependent nascent transcription. This group also included several TFs  
150 that have not been previously implicated in neuronal activation, including Maff and Hspa5, both of which  
151 exhibited higher expression and regulon activity upon activation (**Fig. 2d**). In addition, both Rfx3, a  
152 ciliogenic TF<sup>19</sup>, and the neural cell fate regulator Pou3f1<sup>20</sup> were identified as potential novel regulators  
153 induced by neuronal activity. Furthermore, we observed regulon activity of cell-type-specific TFs  
154 (Neurod1/2 for Ex, Sox2/3 for Ex-NP and Dlx1/2 for Inh), which are associated with stable cell-type  
155 identities and detected in both nascent and pre-existing transcriptomes (**Fig. 2d**). Collectively, these data  
156 suggest that scNT-Seq allows for the analysis of cell-type-specific TF regulons that underly the dynamic  
157 cellular responses of both nascent and pre-existing transcriptomes to acute and sustained stimuli.

158

### 159 **scNT-Seq enables nascent transcription-based RNA velocity analysis**

160 A fundamental question in gene regulation is how transcriptional states in single cells change over time in  
161 response to both acute (minutes) and sustained (hours to days) external stimuli. Recent work showed  
162 that the time derivative of the gene expression state, termed “RNA velocity,” can be estimated by  
163 distinguishing between unspliced (“new” intronic reads) and spliced (“old” exonic reads) mRNAs in  
164 scRNA-Seq datasets<sup>21</sup>. The RNA velocity measurement can predict the future state of individual cells on  
165 a timescale of hours. Because ultra-short metabolic labeling (5 minutes of 4sU pulse) can be used to  
166 identify transient RNAs<sup>22</sup> and scNT-Seq enables direct measurements of nascent and pre-existing

167 transcripts from the same cell, we next sought to augment the RNA velocity model to predict rapid cell  
168 state changes by replacing unspliced/spliced read levels with UMI-based nascent and total RNA levels.  
169 We focused on the excitatory neurons as this population of neurons robustly responds to neuronal  
170 activation. To compare unspliced/spliced ratio-based RNA velocity (termed “splicing RNA velocity”) and  
171 nascent RNA fraction-based velocity (termed “nascent RNA velocity”) directly, we projected and aligned  
172 both velocity fields onto the same UMAP plot (**Fig. 3a**). While splicing RNA velocity showed a steady  
173 directional flow (arrows) from 60 to 120 min (left in **Fig. 3a**), nascent RNA velocity revealed two distinct  
174 phases of velocity flows (early phase: 15 to 30 min; late phase: 60 to 120 min) (right in **Fig. 3a**). Thus, our  
175 analyses are consistent with recent reports that these two types of velocity measurements convey  
176 different but complementary information on the future state of a cell<sup>8, 21</sup>.

177 Nascent RNA velocity is grounded in direct measurements of metabolically labeled nascent transcription,  
178 and this approach promises to improve quantitative analysis of the dynamics of cell states, particularly for  
179 the analysis of transient and dynamic responses to rapid external stimulation. Indeed, nascent RNA  
180 velocity (area under the receiver operating characteristic curve (AUC) value = 82.5%) outperformed  
181 splicing RNA velocity (AUC=51.5%) analysis in predicting the activity-induced primary response genes  
182 (PRGs, 137 genes) that were identified in targeted bulk RNA-seq analysis of primary cortical neurons<sup>16</sup>  
183 (**Fig. 3b**). These results show that nascent RNA velocity is more reliable in revealing the rapid  
184 transcriptional changes following acute neuronal activation.

185 To further explore the molecular basis underlying the two distinct phases of nascent RNA velocity flows,  
186 we identified the TF regulons that are significantly associated with early- (n=24; induced at 15 or 30 min)  
187 or late-response (n=73; induced at 60 or 120 min) genes (**Fig. 3c, Supplementary Fig. 4c**). We further  
188 projected aggregated nascent RNA levels of early- and late-response genes onto respective RNA velocity  
189 fields to visualize the relationship between distinct activity-patterns and ARG induction (**Fig. 3d**). Next,  
190 we projected TF regulon activity onto nascent RNA velocity field, revealing distinct activity patterns of TFs  
191 primarily associated with either early- (Jun) or late- (Mef2d) response genes in dynamic cell state  
192 changes (**Fig. 3e**). Together, these results indicate that integrative analysis of nascent RNA velocity and  
193 TF regulon activity can be a powerful approach to reveal molecular insights into dynamic cellular  
194 processes.

195

### 196 **scNT-Seq captures changes in nascent transcription during the pluripotent-to-totipotent stem cell** 197 **state transition.**

198 Determining temporal RNA dynamics such as nascent transcriptional events within rare, transient cell  
199 populations is critical to understanding cell state transition but has remained a significant challenge for  
200 stem cell research. Recent advances in multiplex single-molecule imaging using sequential fluorescence  
201 *in situ* hybridization (seqFISH) and intron probes allows for the detection of nascent transcription sites at  
202 the single-cell level<sup>23</sup>; however, such imaging approaches are currently time-consuming and have not

203 been used to study rare stem cell populations at scale. Using mESC cultures as a model, we sought to  
204 determine whether scNT-Seq could be used to directly investigate changes in nascent transcription and  
205 cell state transition within rare stem cell populations.

206 Cultured mESCs are derived from the inner cell mass of pre-implantation blastocysts and exhibit a high  
207 level of transcriptional heterogeneity<sup>24</sup>. Interestingly, cells resembling 2-cell-stage embryos (2C-like cells),  
208 which are in a totipotent state and can differentiate into both embryonic and extraembryonic tissues, arise  
209 spontaneously in mESC cultures<sup>25</sup>. Nearly all mESCs reversibly cycle between pluripotent and totipotent  
210 2C-like state in culture. However, the 2C-like cells are rare in mESC cultures (<1% in standard culture  
211 conditions)<sup>25</sup>, making it challenging to study these totipotent cells with traditional methods. Recent studies  
212 using scRNA-Seq revealed changes in total RNAs during the transition to rare 2C-like state<sup>26, 27</sup> and  
213 identified an intermediate state during this low-frequency transition process, supporting a stepwise model  
214 of transcriptional reprogramming of the pluripotent to 2C-like state transition<sup>26, 27</sup>. However, these studies  
215 cannot distinguish nascent from pre-existing RNAs at each state. Thus, a more detailed understanding of  
216 direct gene regulatory changes in response to state transition is lacking.

217 To capture nascent transcriptomes and characterize GRNs in different states, mESCs were metabolically  
218 labeled with 4sU for 4 hours and were subjected to scNT-Seq analysis (**Fig. 4a**). After quality filtering, we  
219 obtained 4,633 single-cell transcriptomes from two biological replicates (**Supplementary Fig. 6a, b**).  
220 Unbiased clustering not only readily separated contaminating mouse feeder cells (*Col1a2/Thbs1+*) from  
221 mESCs, but also identified three principal states within mESCs (**Supplementary Fig. 6a-c**). The majority  
222 of mESCs (98.3%) belong to the pluripotent state as they are positive for pluripotency-genes such as  
223 *Sox2* and *Zfp42* (also known as *Rex1*) but are negative for 2C-embryo-specific transcripts such as the  
224 *Zscan4* gene family (**Fig. 4b**). Approximately 0.7% of cells express high levels of 2C-like state markers,  
225 including *Zscan4* genes, *Zfp352* and *Usp17lc*, but low levels of *Sox2*, suggesting that this rare population  
226 contains predominantly totipotent 2C-like cells. These results are consistent with previous FACS analysis  
227 of 2C-reporter lines<sup>25, 28</sup>, indicating that scNT-Seq accurately captures this rare cell state. Interestingly, we  
228 also identified an intermediate state (~1.0%) which expresses low levels of *Zscan4* genes, but high levels  
229 of *Nanog* and *Tbx3* (**Supplementary Fig. 6c, d**). Unlike previous studies which overexpressed a master  
230 regulator, *Dux*, to induce 2C-like state<sup>27</sup>, we did not observe a significant decrease in *Sox2* expression in  
231 the intermediate state (**Supplementary Fig. 6c**), highlighting the potential difference between the *Dux*-  
232 induced 2C-transitions and the naturally occurring pluripotent-to-totipotent transition process.

233 Comparative analysis of nascent and pre-existing transcriptomes revealed many state-specific genes  
234 (e.g., *Sox2* and *Zscan4d*) are associated with a higher proportion of nascent transcripts (consistent with  
235 their regulatory roles), whereas house-keeping genes, such as *Gapdh*, are of slower turnover rate  
236 (**Supplemental Fig. 7a, b**). For many state-specific genes (e.g., *Zfp42* and *Zscan4d*), their nascent RNA  
237 levels exhibited a more pronounced difference between states than the change of pre-existing RNAs (**Fig.**  
238 **4b, c**), indicating that nascent transcription is a more sensitive indicator for the state transition. Gene

239 Ontology (GO) enrichment analysis further revealed that state-specific nascent and pre-existing  
240 transcripts were enriched for different GO terms (**Fig. 4d**). For instance, many pluripotent-state-specific  
241 nascent RNAs (but not pre-existing RNAs) are functionally related to post-transcriptional regulatory  
242 processes, including translational initiation, mRNA processing, and RNA splicing. Furthermore, 2C-state-  
243 specific nascent transcripts are preferentially enriched for deubiquitinating enzyme-related genes such as  
244 *Usp17lc/d/e* (**Fig. 4b, d**). These results underscore that nascent transcriptomes are more robust than  
245 steady-state transcriptomes to uncover genes related to state-specific biological processes within  
246 heterogeneous stem cell populations.

247 DNA-binding proteins, such as TFs and epigenetic regulators, show rapid gene expression changes  
248 during pluripotent-to-2C transition<sup>27, 29</sup>. Our analysis of changes in nascent transcription during the  
249 pluripotent-to-2C transition identified 26 genes encoding DNA-binding proteins that showed a significant  
250 difference at nascent RNA levels between states (**Fig. 4e**). Consistent with previous scRNA-Seq analysis  
251 of sorted cell populations<sup>29</sup>, 13 out of 14 commonly detected genes (*Tet1*, *Sox2*, *Nanog*, *Rex1/Zfp42*,  
252 *Sp110*, *Zfp352*, and *Zscan4* family) showed similar patterns in our scNT-Seq analysis of nascent RNAs  
253 (**Fig. 4e**). To further investigate TF/epigenetic regulator activity during the pluripotent-to-2C transition, we  
254 applied SCENIC analysis to both nascent and pre-existing transcriptomes. Among all regulons uncovered  
255 in mESCs (**Supplementary Fig. 8a**), we identified 25 TF/epigenetic regulators showing differential  
256 nascent regulon activity between states (**Fig. 4f** and **Supplementary Fig. 8b**). The activity of several  
257 positive regulators of the cell cycle, such as the E2F family of TFs, decreased in 2C-like states, which is  
258 consistent with previous observations that 2C-like cells are associated with longer cell cycles<sup>30</sup>.  
259 Interestingly, nascent RNA levels and regulon activity of *Nanog* peak in intermediate state compared to  
260 pluripotent and totipotent 2C-like states, suggesting that this TF may play an unrecognized regulatory role  
261 in intermediate state. In addition, several epigenetic regulators, including *Phf8*, *Hdac2*, *Ezh2*, and *Tet1*,  
262 were associated with a decrease in regulon activity (**Fig. 4f**), suggesting a role of these enzymes in  
263 promoting the pluripotent state. Notably, we did not identify the regulon activity of *Zscan4* in 2C-like cells,  
264 potentially due to the lack of *Zscan4* motif information in the SCENIC TF database. Together, scNT-Seq  
265 directly captures state-specific nascent transcriptomes in rare totipotent cells in heterogeneous mESC  
266 cultures and allows analysis of dynamics of nascent regulon activity during state transitions.

267

### 268 **TET-dependent regulation of the stepwise pluripotent-to-2C transition**

269 The TET family of proteins (*Tet1-3*) are DNA dioxygenases that mediate active DNA demethylation at  
270 many *cis*-regulatory elements such as promoters and distal enhancers<sup>31, 32</sup>, thereby regulating gene  
271 expression. During pluripotent-to-2C transition, both nascent RNA level and regulon activity of *Tet1*  
272 rapidly decreased (**Fig. 4c, f**). The nascent transcript level of *Tet2* also decreased in both intermediate  
273 and 2C-like states, while *Tet3* was undetected in all three states (**Supplementary Fig. 7c**). Interestingly,

274 genetic inactivation of all TET proteins in mESCs resulted in a substantially higher proportion of 2C-like  
275 cells, and elevated expression level of 2C-specific transcripts<sup>28</sup>.

276 To better understand the role of TET enzymes in state transition, we generated mESCs deficient for all  
277 three Tet proteins (*Tet1/2/3* triple knockout, *Tet*-TKO) via CRISPR/Cas9 genome editing using previously-  
278 tested sgRNAs<sup>33</sup> and analyzed isogenic WT and *Tet*-TKO mESCs (J1 strain) by scNT-Seq after 4 hours  
279 of metabolic labeling. The genotype of *Tet*-TKO cells was confirmed by both Sanger sequencing and  
280 reads from scNT-Seq (**Supplementary Fig. 9a**). Clustering and nascent RNA velocity analyses of  
281 combined WT and *Tet*-TKO mESCs revealed two discrete phases of nascent RNA velocity flows (arrows).  
282 The velocity flow within the pluripotent state is potentially driven by cell-cycle progression  
283 (**Supplementary Fig. 9b, c**), whereas nascent velocity field of intermediate/2C-like states exhibited a  
284 strong directional flow from intermediate to 2C-like state (**Fig. 5a, b**). These observations are consistent  
285 with a stepwise model of the state-transition process and suggest that the pluripotent-to-intermediate  
286 state transition is a rate-limiting step.

287 WT and *Tet*-TKO cells were separately clustered within the pluripotent state and *Tet*-TKO (but not WT)  
288 cells were found immediately next to the intermediate/2C-like states (**Fig. 5a, b**), suggesting that *Tet*-TKO  
289 cells are transcriptionally reprogrammed to adopt a more poised state to transition to intermediate/2C-like  
290 states. Compared to WT cells, *Tet*-TKO cells exhibited a 2.2-fold or 3.6-fold increase in intermediate or  
291 2C-like states (**Fig. 5c**), respectively, indicating that Tet enzymes negatively regulate the transition from  
292 pluripotent to intermediate/2C-like state in WT cells. Because pluripotent and 2C-like cells are globally  
293 distinct in levels of both major histone modifications<sup>25</sup> and DNA methylation<sup>26</sup>, we next examined global  
294 nascent transcription in each state. Interestingly, aggregating nascent transcriptomes within specific  
295 states revealed that a totipotent 2C-like state is associated with markedly lower levels of global nascent  
296 transcription compared to pluripotent and intermediate states in WT cells (**Fig. 5d**). In contrast, *Tet*-TKO  
297 cells already exhibited a substantially lower level of global nascent transcription than WT cells in  
298 pluripotent state (**Fig. 5d**), suggesting that Tet proteins may act as an epigenetic barrier for the  
299 pluripotent-to-2C transition by maintaining a pluripotent state-specific nascent transcriptome.

300

301 **Pulse-chase scNT-Seq enables transcriptome-wide measurement of mRNA stability in rare 2C-like**  
302 **cells.**

303 Pulse-chase assays combined with bulk SLAM-Seq have been used to measure mRNA stability in  
304 mESCs<sup>5</sup>, but rare intermediate and 2C-like cells have not been studied. Given the enhanced sensitivity of  
305 scNT-Seq compared to bulk assays, combining a pulse-chase strategy with scNT-Seq may enable  
306 transcriptome-wide measurement of mRNA stability in rare cell populations. To test this, we metabolically  
307 labeled mESC cultures with 4sU for 24 hours (pulse), followed by a washout and chase using medium  
308 containing a higher concentration of uridine. Cells from multiple chase time-points were harvested and  
309 cryo-preserved first, and all samples were then re-hydrated and simultaneously analyzed by scNT-Seq



310 analysis. After computing the proportion of labeled transcripts for each gene at every time-point relative to  
311 0 h (right after pulse), we calculated the half-life ( $t_{1/2}$ ) of mRNAs by fitting a single-exponential decay  
312 model in each cell state (**Fig. 6a**). In total, 20,190 cells were profiled by scNT-Seq from 7 time-points (**Fig.**  
313 **6b**). After 24 hours of metabolic labeling, we observed a substantial accumulation of T-to-C substitution  
314 (**Fig. 6c**), which is consistent with bulk assay observations<sup>5</sup>. The T-to-C substitution rate decreased over  
315 time and returned to the baseline level 24 hours after chase (**Fig. 6c**). Inspection of two genes, *Sox2* and  
316 *Topa2a*, revealed that total RNA levels did not change across the 24-hour time course, whereas the level  
317 of metabolically labeled transcripts decreased over time (**Supplementary Fig. 10a**), confirming that this  
318 strategy can accurately measure mRNA decay in a transcript-specific manner.

319 Based on expression of marker genes, clustering analysis readily separated mESCs into three states  
320 ( $n=7$ , pluripotent: 97.4% $\pm$ 0.78%, intermediate: 1.5% $\pm$ 0.48%, and 2C-like: 1.1% $\pm$ 0.38%) (**Fig. 6b** and  
321 **Supplementary Fig 10b**), suggesting that this pulse-chase approach did not significantly alter the state  
322 transition. By filtering out genes expressed in less than 5% of cells, we were able to determine the half-life  
323 of 2,310 genes in pluripotent state, and the RNA half-life determined by pulse-chase scNT-Seq is highly  
324 concordant with previous observation derived from bulk SLAM-Seq assays<sup>5</sup> ( $R^2=0.81$ , **Fig. 6d**). RNA  
325 stability can also be estimated by assuming simple exponential kinetics, which is calculated by measuring  
326 the ratio of labeled and unlabeled transcripts after metabolic labeling for a specific time<sup>34</sup>. However, RNA  
327 half-life estimated from one timepoint labeling (4sU, 4 hour) experiment is substantially less correlated  
328 with measurements derived from bulk assays ( $R^2=0.49$ , **Fig. 6d**). These results suggest that a pulse-  
329 chase strategy may more reliably measure RNA decay rate. Furthermore, the top 10% most stable and  
330 unstable transcripts were enriched for similar GO terms that are uncovered by bulk SLAM-Seq assays<sup>5</sup>  
331 (**Supplementary Fig. 10c**). Further analysis of cells in intermediate and 2C-like states revealed the half-  
332 life of 1,743 and 821 transcripts in these rare cell states, respectively. Next, we analyzed commonly  
333 detected transcripts between cell states to reveal state-specific regulation of mRNA stability  
334 (**Supplementary Fig. 11**). Thus, scNT-seq enables transcriptome-wide measurement of RNA stability in  
335 rare stem cell populations in heterogeneous mESC cultures.

336 Because dynamic changes in RNA levels are regulated by the interplay of RNA biogenesis and  
337 degradation, we sought to investigate the relationship between mRNA stability and gene expression  
338 during the pluripotent-to-2C transition (**Supplementary Fig. 12**). Consistent with previous findings<sup>2</sup>, RNA  
339 stability and total mRNA levels are not highly correlated, suggesting mRNA stability is not the major  
340 contributor to total RNA level during stem cell state transition. Nevertheless, we identified a group of  
341 genes showing coordinated changes of RNA stability and gene expression level between pluripotent and  
342 2C-like states, suggesting mRNA stability may play a role in regulating total mRNA level for a subset of  
343 genes (**Fig. 6e**). Further analysis showed that six RNA-binding protein (RBP) binding motifs were  
344 enriched in 3'UTR of 15 genes showing coordinated changes (**Fig. 6f**). Among these RBPs, the Pabpc  
345 family proteins (Pabpc1 and Pabpc4) are known regulators of mRNA stability and translation efficiency by



346 binding poly-A tails of mRNAs<sup>35</sup>. Collectively, these results indicate that scNT-Seq can serve as a  
347 powerful approach to investigate RNA stability and post-transcriptional regulatory mechanisms in rare  
348 cells within a heterogeneous population of cells.

349

## 350 **DISCUSSION**

351 By combining the widely accessible Drop-Seq platform and TimeLapse chemistry, scNT-Seq provides a  
352 novel strategy for high-throughput analysis of nascent and pre-existing transcriptomes from the same cell.  
353 A major advantage of scNT-Seq is its ability to accurately estimate nascent RNA levels using UMI-based  
354 statistical correction, which not only reveals acute changes in the nascent transcription that are not  
355 apparent in standard scRNA-seq, but also allows for the analysis of dynamic TF regulatory networks and  
356 single-cell transcriptional trajectory. Our scNT-Seq is conceptually similar to sci-fate<sup>36</sup>, a recently  
357 developed method that integrates SLAM-Seq chemistry with single-cell combinatorial indexing RNA-Seq.  
358 While scNT-Seq directly captures whole-cell total RNAs on barcoded beads in nanoliter droplets, sci-fate  
359 requires paraformaldehyde fixation and permeabilization of cells for *in situ* chemical conversion and  
360 reverse transcription, which may pose a challenge to unbiasedly recover both nuclear (enriched for  
361 nascent) and cytoplasmic (enriched for pre-existing) RNAs for accurately estimating nascent RNA  
362 fractions.

363 Recent studies demonstrate that the purine analog, 6-thioguanine (6tG), enables G-to-A conversions by  
364 TimeLapse chemistry in bulk RNA-seq<sup>37</sup>. Thus, dual labeling of 4sU and 6tG followed by scNT-Seq may  
365 allow two independent recordings of nascent transcription at single-cell levels. With new computational  
366 approaches such as Dynamo<sup>38</sup>, which can take advantage of controlled metabolic labeling to predict past  
367 and future cell states over an extended time period, high-throughput single-cell nascent transcriptomic  
368 analysis methods such as scNT-Seq and sci-fate can open new lines of inquiry regarding cell-type-  
369 specific RNA regulatory mechanisms and provide a broadly applicable strategy to investigate dynamic  
370 biological systems.

371 **ACKNOWLEDGEMENTS**

372 We are grateful to all members of the Wu lab for helpful discussion. This work was supported by the Penn  
373 Epigenetics Institute, the National Human Genome Research Institute (NHGRI) grants R00-HG007982  
374 and R01-HG010646, National Heart Lung and Blood Institute (NHLBI) grant DP2-HL142044, and National  
375 Cancer Institute (NCI) grant U2C-CA233285 (to H.W.). The work of P.C. is partially supported by Stand-  
376 Up-To-Cancer Convergence 2.0.

377

378 **AUTHOR CONTRIBUTIONS**

379 H.W., Q.Q., and P.H. conceived of and developed the scNT-Seq approach. Q.Q. conducted most of the  
380 experiments. P.H. generated *Tet1/2/3* TKO mESC line and performed most of the computational analysis.  
381 K.G. and P.C. contributed to the statistical modeling of T-to-C substitution. Q.Q., P.H., and H.W. analyzed  
382 the results and wrote the manuscript, with contributions from all of the authors. H.W. supervised the  
383 project.

384

385 **COMPETING FINANCIAL INTERESTS**

386 The authors declare no competing interest.

387

388

389

390

391

392

393

394

395

396

397

398

399

400

401

402

403

404

405

406

407

408

409

410

411

412

413

414

415

416

417

418

419

420

## 421 Online Methods

422

### 423 Mouse embryonic stem cell cultures and 4sU labeling

424 *Tet1/2/3* triple-knock out (*Tet*-TKO) J1 mESCs were generated by CRISPR/Cas9 genome editing as  
425 previously described<sup>33</sup> and the genotype was confirmed by Sanger sequencing and scRNA-Seq. Wild-  
426 type (WT) and *Tet*-TKO J1 mESCs (ATCC, SCRC-1010) were initially cultured in presence of Mitomycin  
427 C inactivated mouse embryonic fibroblasts on 0.1% gelatin-coated (Millipore, ES-006-B) 6-well plates in  
428 Dulbecco's Modified Eagle's Medium (DMEM) (Gibco, 11965084) supplemented with 15% fetal bovine  
429 serum (Gibco, 16000044), 0.1 mM nonessential amino acid (Gibco, 11140050), 1 mM sodium pyruvate  
430 (Gibco, 11360070), 2 mM L-glutamine (Gibco, 25030081), 50  $\mu$ M 2-mercaptoethanol (Gibco, 31350010),  
431 1  $\mu$ M MEK inhibitor PD0325901 (Axon Med Chem, Axon 2128) and 3  $\mu$ M GSK3 inhibitor CHIR99021  
432 (Axon Med Chem, Axon 2128), and 1,000 U/mL LIF (Gemini Bio-Products, 400-495-7).

433 4-thiouridine (4sU) (Alfa Aesar, J60679) were dissolved in DMSO to make 1 M stock. Before 4sU labeling  
434 experiments, WT and *Tet*-TKO mESCs were passaged and cultured in feeder-free conditions (0.1%  
435 gelatin-coated plates) for 48 hrs. For 4sU labeling in WT and Tet TKO mESC cultures, the medium was  
436 replaced with fresh mESC medium supplemented with 100  $\mu$ M 4sU. After 4 h, mESCs were rinsed once  
437 with PBS and dissociated with TrypLE-Express (Gibco, 12605010) for 5 min at 37°C. After neutralizing  
438 with culture medium, cells were pelleted at 1,000 rpm for 3 min. After cell counting with the Countess II  
439 system, the single cell suspension was diluted to 100 cells/ $\mu$ L with DPBS containing 0.01% BSA for  
440 scNT-Seq analysis.

441

### 442 Human K562 cell cultures and species mixing experiments

443 Human K562 cells (ATCC, CCL-243) were cultured in RPMI media supplemented with 10% FBS (Sigma,  
444 F6178). For species mixing experiments, the mESC or K562 media was replaced with media  
445 supplemented with 4sU (100  $\mu$ M). After 4 h, the mESCs and K562 cells were rinsed with PBS and  
446 harvested for scNT-Seq analysis.

447

### 448 Mouse primary neuronal culture and stimulation

449 Mouse cortices were dissected from embryonic day 16 (E16) C57BL/6 embryos of mixed sex (Charles  
450 River). Cortical neurons were dissociated with papain (Worthington) and plated on 6-well plates (at a  
451 density of ~600,000 cells/well) coated with poly-ornithine (30mg/mL, Sigma, P2533). Mouse cortical  
452 neuronal cultures were maintained in neurobasal media (Gibco, 21103049) supplemented with B27  
453 (Gibco, 17504044), 2 mM GlutaMAX (Gibco, 35050061), and 1X Penicillin/streptomycin (Gibco,  
454 15140122).

455 After 4 days *in vitro* culture, primary cortical cultures were stimulated with a final concentration of 55mM  
456 potassium chloride (KCl) for various time (0, 15, 30, 60, and 120 minutes). Before neuronal activation, the  
457 fresh media supplemented with 4sU (200  $\mu$ M) was added. After 4sU labeling (2 h), the cells were washed  
458 with PBS once and were digested with 0.05% Trypsin-EDTA (Gibco, 25300054) for 20 min at 37°C, then  
459 replaced the buffer with 1 mL of DPBS and dissociated cells with a cell-scraper. After cell counting with  
460 Countess II system, the single cell suspension was diluted to 100 cells/ $\mu$ L with DPBS containing 0.01%  
461 BSA for scNT-Seq analysis.

462

### 463 Cell fixation, cryopreservation and rehydration for scNT-Seq

464 The cell fixation was performed as previously described<sup>39</sup>. Cultured mESCs in 6-well plates were digested  
465 with TrypLE-Express and harvested as aforementioned. After washing once with DPBS, the cells were  
466 resuspended with 0.4 mL of DPBS containing 0.01% BSA. Split the cells to two 1.5 mL LoBind tubes  
467 (Eppendorf) and add 0.8 mL methanol dropwise at final concentration of 80% methanol in DPBS. After  
468 mixing and incubating the cell suspension on ice for 1 hour, store the fixed cells in LoBind tubes at -80°C  
469 freezer for up to one month. For rehydration, cells were kept on ice after moved from -80 °C and kept in  
470 the cold throughout the procedure. After the cells were spun-down at 1,000 g for 5 min at 4°C, Methanol-

471 PBS solution was removed and cells were resuspended in 1 mL 0.01% BSA in DPBS supplemented with  
472 0.5% RNase-inhibitor (Lucigen, 30281-2). After cell counting with the Countess II system, the single cell  
473 suspension was diluted to 100 cells/ $\mu$ L and immediately used for scNT-Seq analysis.  
474

#### 475 **Pulse-chase experiment for RNA stability analysis**

476 Remove the medium from plates and add mESC medium supplemented with 200  $\mu$ M 4sU<sup>5</sup>. The fresh  
477 medium with 4sU were changed every 4 h to enhance 4sU incorporation and mESCs were labeled for 24  
478 hrs. After 4sU-labeling, the 4sU-containing medium was removed and cells were washed once with  
479 DPBS. Then mESC medium containing 10 mM Uridine (Sigma, U6381) was added to the culture before  
480 cells were harvested at different time-points ranging from 0.5 hour to 24 hours. Cells were fixed with  
481 methanol as aforementioned and store at -80°C for future use.  
482

#### 483 **scNT-Seq library preparation and sequencing**

484 Drop-Seq was performed as previously described with minor modifications<sup>10</sup>. Specifically, the single cell  
485 suspension was diluted to a concentration of 100 cells/ $\mu$ L in DPBS containing 0.01% BSA. Approximately  
486 1.5 mL of diluted single cell suspension was loaded for each scNT-Seq run. The single-nucleus  
487 suspension was then co-encapsulated with barcoded beads (ChemGenes) using an Aquapel-coated  
488 PDMS microfluidic device (uFluidix) connected to syringe pumps (KD Scientific) via polyethylene tubing  
489 with an inner diameter of 0.38 mm (Scientific Commodities). Barcoded beads were resuspended in lysis  
490 buffer (200 mM Tris-HCl pH8.0, 20 mM EDTA, 6% Ficoll PM-400 (GE Healthcare/Fisher Scientific), 0.2%  
491 Sarkosyl (Sigma-Aldrich), and 50 mM DTT (Fermentas; freshly made on the day of run) at a concentration  
492 of 120 beads/ $\mu$ L. The flow rates for cells and beads were set to 3,200  $\mu$ L/hour, while QX200 droplet  
493 generation oil (Bio-rad) was run at 12,500  $\mu$ L/h. A typical run lasts ~20 min.

494 Droplet breakage with Perfluoro-1-octanol (Sigma-Aldrich). After droplet breakage, the beads were  
495 treated with TimeLapse chemistry to convert 4sU to cytidine-analog<sup>6</sup>. Briefly, 50,000-100,000 beads were  
496 washed once with 450  $\mu$ L washing buffer (1 mM EDTA, 100 mM sodium acetate (pH 5.2)), then the beads  
497 were resuspended with a mixture of TFEA (600 mM), EDTA (1 mM) and sodium acetate (pH 5.2, 100  
498 mM) in water. A solution of 192 mM NaIO<sub>4</sub> was then added (final concentration: 10 mM) and incubated at  
499 45°C for 1 hour with rotation. The beads were washed once with 1 mL TE, then incubated in 0.5 mL 1 X  
500 Reducing Buffer (10 mM DTT, 100 mM NaCl, 10 mM Tris pH 7.4, 1 mM EDTA) at 37°C for 30 min with  
501 rotation, followed by washing once with 0.3 mL 2X RT-buffer.

502 Reverse transcription and exonuclease I treatment were performed, as previously described, with minor  
503 modifications<sup>10</sup>. Specifically, up to 120,000 beads, 200  $\mu$ L of reverse transcription (RT) mix (1x Maxima  
504 RT buffer (ThermoFisher), 4% Ficoll PM-400, 1 mM dNTPs (Clontech), 1 U/ $\mu$ L RNase inhibitor, 2.5  $\mu$ M  
505 Template Switch Oligo (TSO: AAGCAGTGGTATCAACGCAGAGTGAATrGrGrG)<sup>10</sup>, and 10 U/ $\mu$ L  
506 Maxima H Minus Reverse Transcriptase (ThermoFisher)) were added. The RT reaction was incubated at  
507 room temperature for 30 minutes, followed by incubation at 42°C for 120 minutes. To determine an  
508 optimal number of PCR cycles for amplification of cDNA, an aliquot of 6,000 beads (corresponding to  
509 ~100 nuclei) was amplified by PCR in a volume of 50  $\mu$ L (25  $\mu$ L of 2x KAPA HiFi hotstart readymix (KAPA  
510 biosystems), 0.4  $\mu$ L of 100  $\mu$ M TSO-PCR primer (AAGCAGTGGTATCAACGCAGAGT<sup>10</sup>, 24.6  $\mu$ L of  
511 nuclease-free water) with the following thermal cycling parameter (95°C for 3 min; 4 cycles of 98°C for 20  
512 sec, 65°C for 45 sec, 72°C for 3 min; 9 cycles of 98°C for 20 sec, 67°C for 45 sec, 72°C for 3 min; 72°C  
513 for 5 min, hold at 4°C). After two rounds of purification with 0.6x SPRISelect beads (Beckman Coulter),  
514 amplified cDNA was eluted with 10  $\mu$ L of water. 10% of amplified cDNA was used to perform real-time  
515 PCR analysis (1  $\mu$ L of purified cDNA, 0.2  $\mu$ L of 25  $\mu$ M TSO-PCR primer, 5  $\mu$ L of 2x KAPA FAST qPCR  
516 readymix, and 3.8  $\mu$ L of water) to determine the additional number of PCR cycles needed for optimal  
517 cDNA amplification (Applied Biosystems QuantStudio 7 Flex). We then prepared PCR reactions per total  
518 number of barcoded beads collected for each scNT-Seq run, adding 6,000 beads per PCR tube, and ran  
519 the aforementioned program to enrich the cDNA for 4 + 10 to 12 cycles. We then tagmented cDNA using  
520 the Nextera XT DNA sample preparation kit (Illumina, cat# FC-131-1096), starting with 550 pg of cDNA  
521 pooled in equal amounts, from all PCR reactions for a given run. Following cDNA tagmentation, we  
522 further amplified the library with 12 enrichment cycles using the Illumina Nextera XT i7 primers along with

523 the P5-TSO hybrid primer (AATGATACGGCGACCACCGAGATCTACACGCC

524 TGTCCGCGGAAGCAGTGGTATCAACGCAGAGT\*A\*C)<sup>10</sup>. After quality control analysis using a  
525 Bioanalyzer (Agilent), libraries were sequenced on an Illumina NextSeq 500 instrument using the 75- or  
526 150-cycle High Output v2 or v2.5 Kit (Illumina). We loaded the library at 2.0 pM and provided Custom  
527 Read1 Primer (GCCTGTCCGCGGAAGCAGTGGTATCAACGCAGAGTAC) at 0.3  $\mu$ M in position 7 of the  
528 reagent cartridge. The sequencing configuration was 20 bp (Read1), 8 bp (Index1), and 60 or 130 bp  
529 (Read2).

530 Then reverse transcription, exonuclease treatment, cDNA amplification and tagmentation were performed  
531 as previously described<sup>11</sup>. The libraries were diluted to 2.0 pM, and subjected to paired-end sequencing  
532 on Illumina NextSeq 500 sequencer as described previously<sup>11</sup>.

533

### 534 **SLAM-Seq reaction on barcoded Drop-Seq beads**

535 After droplet breakage, the beads were washed once with NaPO<sub>4</sub> buffer with 30% DMSO (50 mM, pH  
536 8.0), then incubate beads in 500  $\mu$ L reaction-mix containing 10 mM IAA for either 15 min at 50°C  
537 (standard SLAM-Seq) or 1 hour at 45°C (modified condition)<sup>5</sup>. Stop reaction by adding 10  $\mu$ L 1 M DTT  
538 (final concentration: 20 mM).

539

### 540 **Bioinformatic analysis**

#### 541 **Read mapping and quantification of labeled and unlabeled transcripts**

542 Paired-end sequencing reads of scNT-Seq were processed as previous described<sup>11</sup> with some  
543 modifications. Briefly, each mRNA read (read2) was tagged with the cell barcode (bases 1 to 12 of read  
544 1) and unique molecular identifier (UMI, bases 13 to 20 of read 1), trimmed of sequencing adaptors and  
545 poly-A sequences, and aligned using STAR v 2.5.2a to the mouse (mm10, Gencode release vM13),  
546 human genome (GRCh38, Gencode release v23), or a concatenation of the mouse and human (for the  
547 species mixing experiment) reference genome assembly. Both exonic and intronic reads mapped to  
548 predicted strands of annotated genes were retained for the downstream analysis. To qualify the labeled  
549 and unlabeled transcripts, uniquely mapped reads with mapping score > 10 were grouped by UMI  
550 barcodes in every cell and were used to determine the T > C substitution using sam2tsv<sup>40</sup>, T > C  
551 substitutions with a base quality of Phred score > 27 were retained. For each experiment, locus with  
552 background T > C substitutions (detected in the sample without TFEA/NaIO<sub>4</sub> treatment) was determined  
553 and was excluded for T > C substitution identification. After background correction of T > C substitution, a  
554 UMI was defined as labeled if there is a T > C substitution in any one of the reads belongs to that  
555 particular UMI. To this end, every UMI will be assigned to labeled or unlabeled based on the existence of  
556 T > C substitution (**Figs 1d and 5d**). For each transcript, the total number of uniquely labeled and  
557 unlabeled UMI sequences were counted and finally were assembled into a matrix using gene name as  
558 rows and cell barcode as columns.

559

#### 560 **Cell type clustering**

561 For mouse cortical neurons and RNA-decay experiment (**Figs 2b and 6b**), the raw digital expression  
562 matrices of nascent and pre-existing UMI counts were added up and loaded into the R package Seurat<sup>41</sup>  
563 (v 2.3.4). For normalization, UMI counts for all cells were scaled by library size (total UMI counts),  
564 multiplied by 10,000 and transformed to log space. Only genes detected in >10 cells were retained. Cell  
565 with a relatively high percentage of UMIs mapped to mitochondrial genes were discarded (QC metrics in  
566 **Supplementary Table 1**). Moreover, cells with lower or higher detected genes were discarded (QC  
567 metrics in **Supplementary Table 1**). As a result, 20,547 cells of mouse cortical culture and 20,190 cells of  
568 mESC (in pulse-chase assay) were retained, respectively. The highly variable genes (HVGs) were  
569 identified using the function *FindVariableGenes* with the parameters: *x.low.cutoff* = .05, *y.cutoff* = .5 in  
570 Seurat, resulting in 2,290 HVGs of primary cortical culture sample and 2,165 HVGs of mESC sample. The



571 expression level of highly variable genes in the cells was scaled and centered along each gene and was  
572 conducted to principal component analysis (PCA). The most significant 30 PCs were selected and used  
573 for 2-dimension reduction by uniform manifold approximation and projection<sup>42</sup> (UMAP), implemented by  
574 the Seurat software with the default parameters. Clusters were identified using the function *FindCluster* in  
575 Seurat with the resolution parameter set to 1. To obtain high level of cell type classification, we merge the  
576 adjacent clusters in UMAP which highly expressed excitatory markers (*Neurod2* and *Neurod6*) and define  
577 it as “Ex” cluster in mouse cortical neurons, while several close clusters highly expressed *Sox2* were  
578 combined to “pluripotent” cluster in mESC Pulse-chase experiment. Cell type specific markers were  
579 identified using function *FindMarkers* in Seurat with wilcoxon rank sum test with default parameters.

580 Cell clustering will be affected both by genotype<sup>28</sup> and by cell type. To enable directly comparative  
581 analyses within cell types between WT and *Tet1/2/3* triple-knock out (*Tet*-TKO) mESCs, we used Seurat  
582 3 (v. 3.0.0.9000) which was demonstrated as an effective strategy to perform joint analyses<sup>43</sup>  
583 (**Supplementary Fig. 6a**). The raw digital expression matrices of nascent and pre-existing UMI counts  
584 were added up and loaded into the Seurat 3. For normalization, UMI counts for all cells were scaled by  
585 library size (total UMI counts), multiplied by 10,000 and transformed to log space. Only genes detected in  
586 >10 cells were retained. Cell with a relatively high percentage of UMIs mapped to mitochondrial genes  
587 (>=0.05) were discarded. Moreover, cells with fewer than 500 or more than 5,000 detected genes were  
588 discarded, resulting in 4,633 WT cells and 2,319 *Tet*-TKO cells. Top 2,000 HVGs were identified using  
589 the function *FindVariableFeatures* with “vst” method. Canonical correlation analysis (CCA) was used to  
590 identify common sources of variation between WT and *Tet*-TKO cells. The first 20 dimensions of the CCA  
591 was chosen to integrate the two datasets. After integration, the expression level of HVGs in the cells was  
592 scaled and centered along each gene and was conducted to PCA analysis. The 20 most significant PCs  
593 were selected and used for 2-dimension reduction by UMAP. Clusters were identified using the function  
594 *FindCluster* in Seurat with the resolution parameter set to 3. As above mentioned, adjacent clusters highly  
595 expressed *Sox2* were combined to “pluripotent” cluster.  
596

## 597 Estimation of the fraction of nascent transcripts

598 We implemented a statistical modeling strategy as previously described with some modifications for UMI-  
599 based scNT-Seq analysis<sup>6</sup>. For each experiment, a binomial mixture model, was used to approximate the  
600 number of T-to-C substitutions  $y_i$  for each gene transcript  $i$ :

$$601 \quad f(y_i|\theta, p, q) = \theta \text{Binom}(y_i; p, n_i) + (1 - \theta) \text{Binom}(y_i; q, n_i)$$

602 In this expression,  $\theta$  is the fraction of nascent transcripts in each experiment,  $p$  and  $q$  are the probabilities  
603 of a T-to-C substitution at each nucleotide for nascent and pre-existing transcripts, respectively, and  $n_i$  is  
604 the number of uridine nucleotides observed in the transcript  $i$ . A consensus sequence for each transcript  
605 is built by pooling reads with the same UMI barcode and taking the most frequent variant at each position.  
606 10,000 UMIs were randomly sampled and the global substitution probabilities  $p$  and  $q$  were estimated  
607 based on the above mixture model. The model was fit by maximizing the likelihood function using the  
608 Nelder-Mead algorithm. The optimization was repeated ten times with random initialization values for  $\theta$ ,  $p$ ,  
609 and  $q$  in the range [0, 1], keeping the best fit with  $\theta \in [0, 1]$ .

610 For mouse cortical neuronal culture datasets, besides Ex and Inh1, we respectively combined 4 inhibitory  
611 neuronal clusters (Inh 2-4 and Inh-NP) and 3 non-neuronal clusters (Ex-NP1, Ex-NP2 and RG) to obtain  
612 enough UMI for global parameters estimation at each time-point. By doing this, Ex, Inh, and 2 combined  
613 clusters were subjected to statistical modelling. For mESC data sets, we assumed that *Tet*-TKO will not  
614 affect 4sU utilization efficiency and thus combined WT and TKO data sets to estimate unified global  
615 parameters,  $p$  and  $q$ , for 3 cell states (pluripotent, intermediate and 2C-like). To this end, 20 sets of  $p$  and  
616  $q$  (5 time-points X 4 combined clusters) were determined in cortical neuronal data sets and 3 sets of  $p$   
617 and  $q$  (pluripotent, intermediate and 2C-like clusters) were estimated for mESC data sets. Once these  
618 global parameters were determined, they were used to estimate the fraction of nascent transcripts.

### 619 1. Computing aggregate nascent transcript for cell clusters



620 **For Figs 2C and S3d**, we aggregate all the UMIs belongs to the same cell-type and estimate the fraction  
621 of nascent transcripts  $\theta$  for each gene with more than 100 UMIs in that cell type at each time-point. The  
622 likelihood function for the mixture model above was maximized using the Brent algorithm with the  
623 constraint  $\theta \in [10^{-8}, 1]$ . The 95% confidence interval was calculated from the Hessian matrix, and  $\theta$   
624 estimates for genes with a confidence interval greater than 0.2 were thrown out. The nascent transcript  
625 ( $N$ ) was then estimated:

$$626 \quad N = \theta(L + U)$$

627 Where  $\theta$  is the nascent fraction of a gene in a cell type,  $L$  is labeled transcripts of a gene,  $U$  is unlabeled  
628 transcripts of a gene. The pre-existing transcript was calculated by:  $(1 - \theta)(L + U)$ .

## 629 2. Computing nascent transcript for each individual cell

630 In theory, for every cell the fraction of nascent transcripts should be calculated for each gene, which  
631 requires adequate gene coverage of each individual cells as bulk RNA-seq analysis. However, for data  
632 sets generated by high-throughput droplet-based scRNA-Seq methods and shallow sequencing, it is not  
633 feasible to obtain sufficient coverage for every gene in individual cells. Moreover, modeling every gene in  
634 thousands of cells were computationally intensive. To obtain the single-cell level estimation of nascent  
635 transcripts in each cell, we introduced detection rate  $\alpha$  to estimate the nascent transcript for each cell.  
636 Since 4sU incorporation is random but each cell may vary in 4sU incorporation and most genes have the  
637 highly similar detection rate  $\alpha$  (**Supplementary Fig. 3d**), we used the strategy above to estimate the  
638 fraction of nascent transcripts for individual cell. The detection rate  $\alpha$  was then computed by dividing all the  
639 labeled transcripts of a cell by estimated nascent transcript of that cell. We discarded the cells without-  
640 range values ( $\alpha > 1$ ). We computed the detection rate  $\alpha$  for 88.3% (18,133/20,547) of mouse cortical  
641 cells, whereas 95.1% (6,609/6,952) of mESC cells were retained. The mean of detection rates  $\alpha$  were  
642 60% and 66% in cortex and mESC, respectively. For each individual gene, the nascent transcript was  
643 computed according to the formula:

$$644 \quad N = \min\left(\frac{L}{\alpha}, (L + U)\right)$$

645 Where  $\alpha$  is the T-to-C detection rate of a cell,  $L$  is the number of labeled transcripts of a gene in that cell,  
646  $U$  is the number of unlabeled transcripts of a gene. The number of pre-existing transcripts was calculated  
647 by:  $L + U - N$ . The computed nascent and pre-existing transcripts were used for all downstream single-  
648 cell-based analysis, including stacked UMAP (**right panel of Fig. 2b** and **Supplementary Fig. 4a**),  
649 SCENIC (**Figs. 2d, 3c, 4f, Supplementary Fig. 5** and **Supplementary Fig. 8a**) and nascent RNA  
650 velocity analysis (**Figs. 3a** and **5b**).

651

## 652 **Gene ontology (GO) enrichment analysis**

653 GO enrichment analysis was performed as previously described<sup>12</sup>. To identify functional categories  
654 associated with defined gene lists, the GO annotations were downloaded from the Ensembl database. An  
655 enrichment analysis was performed via a hypergeometric test. The  $P$  value was calculated using the  
656 following formula:

$$657 \quad P = 1 - \sum_{i=0}^{m-1} \frac{\binom{M}{i} \binom{N-M}{n-i}}{\binom{N}{n}}$$

658 where  $N$  is the total number of background genes,  $n$  is the total number of selected genes,  $M$  is the  
659 number of genes annotated to a certain GO term, and  $i$  is the number of selected genes annotated to a  
660 certain GO term.  $P$  value was corrected by function  $p.adjust$  with false discovery rate (FDR) correction in  
661 R. GO terms with  $FDR < 0.05$  were considered enriched. All statistical calculations were performed in R.

662 For enrichment analysis of stable/unstable mRNAs (**Supplementary Fig.10c**), genes were ranked by the  
663 RNA half-life. Top 10% genes with longest half-lives were defined as stable genes, whereas top 10%  
664 genes with shortest half-life were considered as unstable. Then the stable and unstable gene sets were

665 subjected into GO enrichment analysis. For **Fig. 4d**, genes showed >1.5-fold changes between  
666 pluripotent and 2C-like state were selected and subjected into GO enrichment analysis.  
667

## 668 Identification of differentially expressed genes (DEGs)

669 Differential gene expression analysis of nascent transcripts between different time-points of neuronal  
670 activation (15, 30, 60 and 120 min) and control (0 min) was performed using the function *FindMarkers* in  
671 Seurat, using a Wilcoxon rank sum test. Nascent transcripts with a fold-change of more than 1.5 and an  
672 adjust *P*-value less than 0.05/4 were considered to be differentially expressed (**Supplementary Fig. 4b**).  
673 Neuronal induction genes were defined if a nascent transcript was significantly increased in at least one  
674 time-point with KCl stimulation in any one of cell-types (**Fig. 2c and Supplementary Fig. 4b**). For  
675 comparison among 3 cell states within WT mESCs (**Fig. 4e**), genes encoding DNA binding proteins with a  
676 fold-change of nascent transcript expression level more than 0.25 (log-scale) and an adjust *P*-value less  
677 than 0.2 were listed.  
678

## 679 Estimation of RNA half-life

680 For each gene, we separately aggregate labeled and unlabeled UMI counts in each cell state (**Fig. 6 and**  
681 **Supplementary Fig. 11**). Then the fraction of labeled transcripts was calculated with summed labeled  
682 UMI counts divided by total UMI counts (labeled + unlabeled). The fraction of labeled transcripts was  
683 normalized to chase-onset (0 min). R function *nls* was used to perform curve fitting with the parameters  
684 setting: “*y ~ I(a\*exp(-b\*x)+c)*”, “*start=list(a=1, b=1, c=1)*” and “*na.action=na.exclude*”. We kept the fit with  
685 the goodness of  $R^2 > 0.7$ .  
686

## 687 RNA velocity analysis

688 For standard RNA velocity analysis (splicing RNA velocity), we started with the bam files which were  
689 generated by the Drop-Seq computational analysis pipeline. The reads were demultiplexed using  
690 dropEst<sup>44</sup> (version 0.8.5) pipeline, using “-m -V -b -f -L eiEIBA” options to annotate bam files. The genome  
691 annotations (mm10, Gencode release vM13) were used to count spliced and unspliced molecules for  
692 each experiment. The python package scVelo<sup>21, 45, 46</sup> (<https://github.com/theislab/scvelo>, version 0.1.19)  
693 were employed to perform RNA velocity analysis. Default parameter settings were used, unless stated  
694 otherwise. After loading spliced and unspliced molecules to scVelo, for analysis of excitatory neuron data  
695 sets (**left panel of Fig 3a**), genes with less than 5 counts of spliced or unspliced molecules were filtered  
696 out. Spliced and unspliced counts of top 1,000 highly variable genes were KNN-imputed in a PCA  
697 reduced space with 10 components, using 15 neighbors and ‘distances’ mode. For nascent velocity  
698 analysis (using the ratio of nascent over total transcripts), all the parameters are the same as splicing  
699 RNA velocity analysis except that we loaded computed nascent transcripts (as spliced counts) and total  
700 transcript (as unspliced counts) into scVelo (**right panel of Fig 3a**). For nascent RNA velocity analysis of  
701 mESCs (**Fig 5a**), top 3,000 highly variable genes were KNN-imputed in with 10 PCs, using 15 neighbors  
702 and ‘distances’ mode as well. The gene-specific velocities are obtained by fitting a ratio between nascent  
703 and total mRNA by function ‘*scv.tl.velocity*’. Finally, function ‘*scv.pl.velocity\_embedding\_stream*’ was used  
704 to project the velocities onto UMAP.

705 To directly compare splicing and nascent RNA velocity, we asked which of them could best predict  
706 whether well-known activity induced genes upregulated with different durations of KCl stimulation in  
707 excitatory neurons. The list of 137 primary response genes was previously defined by bulk RNA-Seq<sup>16</sup>.  
708 We calculated the average induction fold of genes (expressed in >1% cells) at 30 min of KCl stimulation  
709 compared to 0 min (**Fig 3b**). For splicing RNA velocity, we used unspliced counts to calculate the  
710 induction fold while estimated nascent transcript were used in nascent RNA velocity analysis. Finally, *auc*  
711 function in R package pROC was conducted to calculate the area under receiver operating characteristic  
712 curve (AUC), which reflects the accuracy of predicting the known PRGs by gene induction fold computed  
713 in different method. The plots were generated by function *plot.roc* in pROC package<sup>47</sup>.  
714

## 715 **Gene regulatory network (GRN) analysis by SCENIC**

716 To assess the regulatory activity of transcript factors associated with different cell states or cell-types, we  
717 used SCENIC<sup>18</sup> (version 1.1.2.2) to perform gene regulatory network (GRN or regulon) analysis.  
718 Regulatory modules are identified by inferring co-expression between TFs and genes containing TF  
719 binding motif in their promoters. We separate expression matrix into two parts based on the expression  
720 level of nascent and pre-existing transcripts, then combined them as inputs to SCENIC analysis, which  
721 enabled us to identify specific regulatory modules associated with either nascent or pre-existing  
722 transcriptomes from the same cell. Two gene-motif rankings, 10kb around the TSS and 500 bp upstream,  
723 were loaded from RcisTarget databases (mm9). Gene detected in > 1% of all the cells and listed in the  
724 gene-motif ranking databases were retained. To this end, 8,744 genes in cortical culture data and 9,388  
725 mESC genes were subjected into the downstream analysis. Then GRNBoost, which was implemented in  
726 pySCENIC, was used to infer the co-expression modules and quantify the weight between TFs and target  
727 genes. Targets genes that did not show a positive correlation (> 0.03) in each TF-module were filtered  
728 out. SCENIC found 4,944 and 5,406 TF-modules in mouse cortical neuronal culture and mESC data sets,  
729 respectively. A *cis*-regulatory motif analysis on each of the TF-modules with RcisTarget revealed 277 and  
730 325 regulons in cortical culture and mESC data, respectively. The top 1 percentile of the number of  
731 detected genes per cell was used to calculate the enrichment of each regulon in each cell. For **Figs. 2d,**  
732 **4f, and Supplementary Fig. 8**, we computed the mean AUC of all cells belongs to defined groups, then  
733 scaled the mean AUC by function *scale* in R. R package *pheatmap*<sup>48</sup> was used to draw the heatmap.

734 For **Fig. 4f and Supplementary Fig. 8**, AUC values of TFs were obtained and then subjected to  
735 Wilcoxon rank sum test to access significance of the difference of TF activity. TFs with a fold-change of  
736 mean AUC values more than 1.5 and an adjust *P*-value (Bonferroni corrected) less than 0.05 were  
737 considered differentially regulated.

738

## 739 **RNA binding protein motif enrichment analysis**

740 For **Fig. 6f**, 3' UTR sequences of 552 genes were retrieved from Ensembl Biomart<sup>49</sup>. All the 3' UTR  
741 sequences of a gene were obtained to explore all possible binding site. The position weight matrix (PWM)  
742 of 188 mouse RNA binding protein motifs were downloaded from CISBP-RNA database<sup>50</sup> ([http://cisbp-  
743 rna.cabr.utoronto.ca/](http://cisbp-rna.cabr.utoronto.ca/)). FIMO<sup>51</sup> (version 5.0.5) motif scanning software in MEME Suite was used to search  
744 for the RNA binding motifs in the 3' UTR sequences. 3' UTR sequences with *P*- values smaller than the  
745 default threshold (0.0001) were considered to contain a binding motif. As a result, 533 genes were  
746 identified to have RNA binding motif in their 3' UTR. Hypergeometric test was performed in R by function  
747 *phyper*, which was used to access significance of RNA binding motif enrichment in defined gene sets.  
748 The pairs of RNA binding protein and targets were visualized in Cytoscape.

749

## 750 **Data availability**

751 All data will be available through from the Gene Expression Omnibus (GEO) database.

752

## 753 **Code availability**

754 The analysis source code underlying the final version of the paper will be available on GitHub repository  
755 (<https://github.com/wulabupenn/scNT-seq>).

756

757

758

759 REFERENCES

- 760 1. Rabani, M. et al. High-resolution sequencing and modeling identifies distinct dynamic RNA  
761 regulatory strategies. *Cell* **159**, 1698-1710 (2014).
- 762 2. Rabani, M. et al. Metabolic labeling of RNA uncovers principles of RNA production and  
763 degradation dynamics in mammalian cells. *Nat Biotechnol* **29**, 436-442 (2011).
- 764 3. Tanay, A. & Regev, A. Scaling single-cell genomics from phenomenology to mechanism. *Nature*  
765 **541**, 331-338 (2017).
- 766 4. Wissink, E.M., Vihervaara, A., Tippens, N.D. & Lis, J.T. Nascent RNA analyses: tracking  
767 transcription and its regulation. *Nat Rev Genet* **20**, 705-723 (2019).
- 768 5. Herzog, V.A. et al. Thiol-linked alkylation of RNA to assess expression dynamics. *Nature methods*  
769 **14**, 1198-1204 (2017).
- 770 6. Schofield, J.A., Duffy, E.E., Kiefer, L., Sullivan, M.C. & Simon, M.D. TimeLapse-seq: adding a  
771 temporal dimension to RNA sequencing through nucleoside recoding. *Nat Methods* **15**, 221-225  
772 (2018).
- 773 7. Rimpl, C. et al. Osmium-Mediated Transformation of 4-Thiouridine to Cytidine as Key To Study  
774 RNA Dynamics by Sequencing. *Angew Chem Int Ed Engl* **56**, 13479-13483 (2017).
- 775 8. Erhard, F. et al. scSLAM-seq reveals core features of transcription dynamics in single cells.  
776 *Nature* **571**, 419-423 (2019).
- 777 9. Hendriks, G.J. et al. NASC-seq monitors RNA synthesis in single cells. *Nature communications* **10**,  
778 3138 (2019).
- 779 10. Macosko, E.Z. et al. Highly Parallel Genome-wide Expression Profiling of Individual Cells Using  
780 Nanoliter Droplets. *Cell* **161**, 1202-1214 (2015).
- 781 11. Hu, P. et al. Dissecting Cell-Type Composition and Activity-Dependent Transcriptional State in  
782 Mammalian Brains by Massively Parallel Single-Nucleus RNA-Seq. *Molecular cell* **68**, 1006-1015  
783 e1007 (2017).
- 784 12. Hu, P. et al. Single-nucleus transcriptomic survey of cell diversity and functional maturation in  
785 postnatal mammalian hearts. *Genes Dev* **32**, 1344-1357 (2018).
- 786 13. Lake, B.B. et al. Integrative single-cell analysis of transcriptional and epigenetic states in the  
787 human adult brain. *Nat Biotechnol* **36**, 70-80 (2018).
- 788 14. Habib, N. et al. Massively parallel single-nucleus RNA-seq with DroNc-seq. *Nature methods* **14**,  
789 955-958 (2017).
- 790 15. Yap, E.L. & Greenberg, M.E. Activity-Regulated Transcription: Bridging the Gap between Neural  
791 Activity and Behavior. *Neuron* **100**, 330-348 (2018).
- 792 16. Tyssowski, K.M. et al. Different Neuronal Activity Patterns Induce Different Gene Expression  
793 Programs. *Neuron* **98**, 530-546 e511 (2018).
- 794 17. Duffy, E.E., Schofield, J.A. & Simon, M.D. Gaining insight into transcriptome-wide RNA  
795 population dynamics through the chemistry of 4-thiouridine. *Wiley interdisciplinary reviews.*  
796 *RNA* **10**, e1513 (2019).
- 797 18. Aibar, S. et al. SCENIC: single-cell regulatory network inference and clustering. *Nat Methods* **14**,  
798 1083-1086 (2017).
- 799 19. Laclef, C. et al. The role of primary cilia in corpus callosum formation is mediated by production  
800 of the Gli3 repressor. *Hum Mol Genet* **24**, 4997-5014 (2015).
- 801 20. Machado, C.B. et al. Reconstruction of phrenic neuron identity in embryonic stem cell-derived  
802 motor neurons. *Development* **141**, 784-794 (2014).
- 803 21. La Manno, G. et al. RNA velocity of single cells. *Nature* **560**, 494-498 (2018).
- 804 22. Schwalb, B. et al. TT-seq maps the human transient transcriptome. *Science* **352**, 1225-1228  
805 (2016).

- 806 23. Shah, S. et al. Dynamics and Spatial Genomics of the Nascent Transcriptome by Intron seqFISH.  
807 *Cell* **174**, 363-376 e316 (2018).
- 808 24. Kolodziejczyk, A.A. et al. Single Cell RNA-Sequencing of Pluripotent States Unlocks Modular  
809 Transcriptional Variation. *Cell stem cell* **17**, 471-485 (2015).
- 810 25. Macfarlan, T.S. et al. Embryonic stem cell potency fluctuates with endogenous retrovirus  
811 activity. *Nature* **487**, 57-63 (2012).
- 812 26. Eckersley-Maslin, M.A. et al. MERVL/Zscan4 Network Activation Results in Transient Genome-  
813 wide DNA Demethylation of mESCs. *Cell reports* **17**, 179-192 (2016).
- 814 27. Fu, X., Wu, X., Djekidel, M.N. & Zhang, Y. Myc and Dnmt1 impede the pluripotent to totipotent  
815 state transition in embryonic stem cells. *Nature cell biology* **21**, 835-844 (2019).
- 816 28. Lu, F., Liu, Y., Jiang, L., Yamaguchi, S. & Zhang, Y. Role of Tet proteins in enhancer activity and  
817 telomere elongation. *Genes Dev* **28**, 2103-2119 (2014).
- 818 29. Rodriguez-Terrones, D. et al. A molecular roadmap for the emergence of early-embryonic-like  
819 cells in culture. *Nature genetics* **50**, 106-119 (2018).
- 820 30. Nakai-Futatsugi, Y. & Niwa, H. Zscan4 Is Activated after Telomere Shortening in Mouse  
821 Embryonic Stem Cells. *Stem cell reports* **6**, 483-495 (2016).
- 822 31. Wu, H. & Zhang, Y. Reversing DNA methylation: mechanisms, genomics, and biological functions.  
823 *Cell* **156**, 45-68 (2014).
- 824 32. Pastor, W.A., Aravind, L. & Rao, A. TETonic shift: biological roles of TET proteins in DNA  
825 demethylation and transcription. *Nature reviews. Molecular cell biology* **14**, 341-356 (2013).
- 826 33. Wang, H. et al. One-step generation of mice carrying mutations in multiple genes by CRISPR/Cas-  
827 mediated genome engineering. *Cell* **153**, 910-918 (2013).
- 828 34. Russo, J., Heck, A.M., Wilusz, J. & Wilusz, C.J. Metabolic labeling and recovery of nascent RNA to  
829 accurately quantify mRNA stability. *Methods* **120**, 39-48 (2017).
- 830 35. Yi, H. et al. PABP Cooperates with the CCR4-NOT Complex to Promote mRNA Deadenylation and  
831 Block Precocious Decay. *Molecular cell* **70**, 1081-1088 e1085 (2018).
- 832 36. Cao, J., Zhou, W., Steemers, F., Trapnell, C. & Shendure, J. Characterizing the temporal dynamics  
833 of gene expression in single cells with sci-fate. *bioRxiv*, 666081 (2019).
- 834 37. Kiefer, L., Schofield, J.A. & Simon, M.D. Expanding the Nucleoside Recoding Toolkit: Revealing  
835 RNA Population Dynamics with 6-Thioguanosine. *Journal of the American Chemical Society* **140**,  
836 14567-14570 (2018).
- 837 38. Qiu, X. et al. Mapping Vector Field of Single Cells. *bioRxiv*, 696724 (2019).
- 838 39. Alles, J. et al. Cell fixation and preservation for droplet-based single-cell transcriptomics. *BMC*  
839 *biology* **15**, 44 (2017).
- 840 40. Lindenbaum, P. Jvarkit: java utilities for bioinformatics. (2015).
- 841 41. Butler, A., Hoffman, P., Smibert, P., Papalexi, E. & Satija, R. Integrating single-cell transcriptomic  
842 data across different conditions, technologies, and species. *Nature Biotechnology* **36**, 411  
843 (2018).
- 844 42. McInnes, L., Healy, J. & Melville, J. Umap: Uniform manifold approximation and projection for  
845 dimension reduction. *arXiv preprint arXiv:1802.03426* (2018).
- 846 43. Stuart, T. et al. Comprehensive Integration of Single-Cell Data. *Cell* (2019).
- 847 44. Petukhov, V. et al. dropEst: pipeline for accurate estimation of molecular counts in droplet-  
848 based single-cell RNA-seq experiments. *Genome Biology* **19**, 78 (2018).
- 849 45. Wolf, F.A., Angerer, P. & Theis, F.J. SCANPY: large-scale single-cell gene expression data analysis.  
850 *Genome Biology* **19**, 15 (2018).
- 851 46. Bergen, V., Lange, M., Peidli, S., Wolf, F.A. & Theis, F.J. Generalizing RNA velocity to transient cell  
852 states through dynamical modeling. *bioRxiv*, 820936 (2019).



- 853 47. Robin, X. et al. pROC: an open-source package for R and S+ to analyze and compare ROC curves.  
854 *BMC Bioinformatics* **12**, 77 (2011).
- 855 48. Kolde, R. & Kolde, M.R. Package 'pheatmap'. *R Package* **1** (2015).
- 856 49. Kinsella, R.J. et al. Ensembl BioMart: a hub for data retrieval across taxonomic space. *Database*  
857 **2011** (2011).
- 858 50. Ray, D. et al. A compendium of RNA-binding motifs for decoding gene regulation. *Nature* **499**,  
859 172 (2013).
- 860 51. Grant, C.E., Bailey, T.L. & Noble, W.S. FIMO: scanning for occurrences of a given motif.  
861 *Bioinformatics* **27**, 1017-1018 (2011).

862

863

864

865

866

867

868

869

870

871

872

873

874

875

876

877

878

879

880

881

882

883

884

885

886



887 **FIGURE LEGENDS**

888 **Figure 1. Development and validation of scNT-Seq.** (a) Overview of single-cell Nascent transcript  
889 Tagging sequencing (scNT-Seq). (b) Multi-species mixing experiment measures scNT-Seq specificity.  
890 Mouse ESCs and human K562 cells were mixed at 1:1 ratio after 4sU labeling (100  $\mu$ M, 4 hrs).  
891 Scatterplot shows the number of transcripts (UMIs) mapped to mouse (y-axis) or human (x-axis) genome  
892 for each cell (dot). Cells with mostly mouse transcripts are labeled as mouse (red), while cells with mostly  
893 human transcripts are labeled as human (blue). Cells with a relatively high percentage of both mouse and  
894 human transcripts are labeled as mixed (green). (c) Transcriptome-wide nucleotide substitutions rates  
895 demonstrate specific T-to-C conversion in 4sU labeled K562 cells after TEFA/NaIO<sub>4</sub>-treatment compared  
896 to untreated control. (d) Box plots showing percentage of T-to-C containing transcripts (UMIs) in individual  
897 K562 cells. The box plots display the median (center line) and interquartile range (IQR, from the 25th to  
898 75th percentile), the whiskers represent 1.5 times the interquartile range, and the circles represent  
899 outliers. (e) All UMIs of the *ACTG1* gene are shown for one K562 cell with or one without TFEA/NaIO<sub>4</sub>-  
900 treatment. Grey circles stand for T without T-to-C substitution, while crosses ("X"s) stand for sites of T-to-  
901 C substitution in at least one read. The color of "X" indicates the read coverage in a UMI containing T-to-  
902 C substitution at a particular site. All reads from one exemplary transcript (2<sup>nd</sup> UMI from TFEA/NaIO<sub>4</sub>-  
903 treated sample) are further shown in the lower panel.

904 **Figure 2. scNT-Seq captures cell-type-specific nascent transcriptional dynamics and TF activity in**  
905 **response to distinct neuronal activity patterns.** (a) Schematics of applying scNT-Seq analysis to study  
906 neuronal activation of primary mouse cortical cultures. (b) Uniform manifold approximation and projection  
907 (UMAP) visualization of 20,547 cells from primary mouse cortical cultures. Relative percentage of each  
908 cell-type is listed on the left. Randomly sampled 1,000 excitatory neurons from 5 time points (200 cells  
909 from each time point) are sub-clustered based on nascent (top) or pre-existing transcripts (bottom). Cells  
910 from each time point are color-coded and projected into the stacked UMAP on the right panel. The  
911 nascent and pre-existing transcriptomes of same cell were connected by a black line. Ex, excitatory  
912 neurons; Inh, inhibitory neurons; NP, neural progenitors; RG, radial glia. (c) Cell-type-specific responses  
913 of activity-regulated genes (ARGs) upon neuronal activation. The mean nascent and pre-existing RNA  
914 expression levels (transcripts per 10k, TP10k) were shown in line plot. (d) Heat map showing cell-type-  
915 specific TF regulon activity (AUC value quantified by SCENIC) in response to distinct activity durations.  
916 Red color highlights known regulators of ARGs, while blue color highlights potential novel regulators  
917 induced by neuronal activity.

918 **Figure 3. scNT-Seq reveals neuronal activity-induced nascent RNA velocity.** (a) RNA velocity  
919 analysis of excitatory neurons using ratios of unspliced-to-spliced transcripts (splicing RNA velocity, left  
920 panel) or nascent-to-total transcripts (nascent RNA velocity, right panel) as inputs. The cells are color-  
921 coded by different neuronal activity durations. The arrow indicates the projection from the observed state  
922 to extrapolated future state. (b) Comparison between splicing and nascent RNA velocity. Spliced counts  
923 or nascent RNA counts (30 min KCl stimulation) were used to predict induction of 137 known primary  
924 response genes<sup>16</sup>. The area under the curve (AUC) values of predictions from these two methods are  
925 shown. (c) Enrichment analysis of TF regulons for early- or late-response genes. Bar plots showing the  
926 significance of enriched TF regulons by hypergeometric test. TF regulons that are enriched for both  
927 groups, only early- or only late-response genes are highlighted by three boxes (left to right). The cut off of  
928 significance was indicated by red dash line (adjusted *P*-value < 0.001). (d) UMAP plots showing clustered  
929 Ex neurons from five time-points (left), expression level of early-response (middle), and late-response  
930 genes (right). (e) UMAP plots showing the regulon activity of two representative TFs regulating early-  
931 (Jun) or late-response genes (Mef2d), respectively. The UMAP plots in Fig. 3d-e are the same as in Fig.  
932 3a.

933 **Figure 4. scNT-Seq captures both nascent and pre-existing transcripts in different states of**  
934 **mESCs.** (a) Schematics of the scNT-Seq analysis of mESCs. (b) MA-plot showing differential gene  
935 expression of nascent and pre-existing transcripts between pluripotent and 2C-like states. Dashed line

936 denotes 1.5-fold differences. (c) The line plots showing nascent and pre-existing transcript levels of *Tet1*  
937 and *Zscan4d* in pluripotent, intermediate, and 2C-like state. (d) Heat map showing enriched GO terms of  
938 state-specific genes. Significance of enrichment (FDR) is scaled by colors. (e) Heat map showing nascent  
939 transcript levels of state-specific genes encoding DNA-binding proteins. (f) Heat map showing the regulon  
940 activity of state-specific TFs or epigenetic regulators. The color scales depict the regulon activity.

941 **Figure 5. scNT-Seq reveals TET-dependent regulation of the pluripotent-to-2C transition.** (a)  
942 Nascent RNA velocity analysis of combined wild-type (WT) and *Tet*-TKO mESCs. The arrow indicates the  
943 projection from the observed state to extrapolated future state. (b) Projection of cell state and the nascent  
944 RNA level of the *Zscan4a* gene on the same UMAP plot as in Fig. 5a. (c) Relative composition of three  
945 stem cell states in WT (4,633 cells) and *Tet*-TKO (2,319 cells) mESCs. (d) The fraction of labeled  
946 transcripts in WT and *Tet*-TKO mESCs across three states. The box plots display the median (center line)  
947 and interquartile range (IQR, from the 25th to 75th percentile), the whiskers represent 1.5 times the  
948 interquartile range, and the circles represent outliers.

949 **Figure 6. Pulse-chase scNT-Seq reveals cell state-specific mRNA decay in mESCs.** (a) Schematics  
950 of pulse-chase scNT-Seq experiment. (b) UMAP plots of 20,190 mESCs profiled in the pulse-chase  
951 scNT-Seq analysis. Cells are colored by three states (left) or by 7 time-points (right). Cell numbers of  
952 each state across different time-points are also shown. (c) Line plots showing temporal changes of  
953 nucleotide substitution rates. (d) Scatterplots showing the correlation of RNA half-life measurements  
954 between this study (top: one timepoint inference analysis; bottom: pulse-chase analysis) and bulk SLAM-  
955 Seq<sup>5</sup>. (e) Heat map (left) and bar plot (right) showing concordant change of RNA half-life (left) and gene  
956 expression (right) between pluripotent and 2C-like states, respectively. (f) Network of RNA-binding  
957 proteins (pink quadrate) and their binding targets (green circle). Enriched RNA-binding proteins were  
958 inferred by motif sequenced enriched in 3'UTR of target genes.

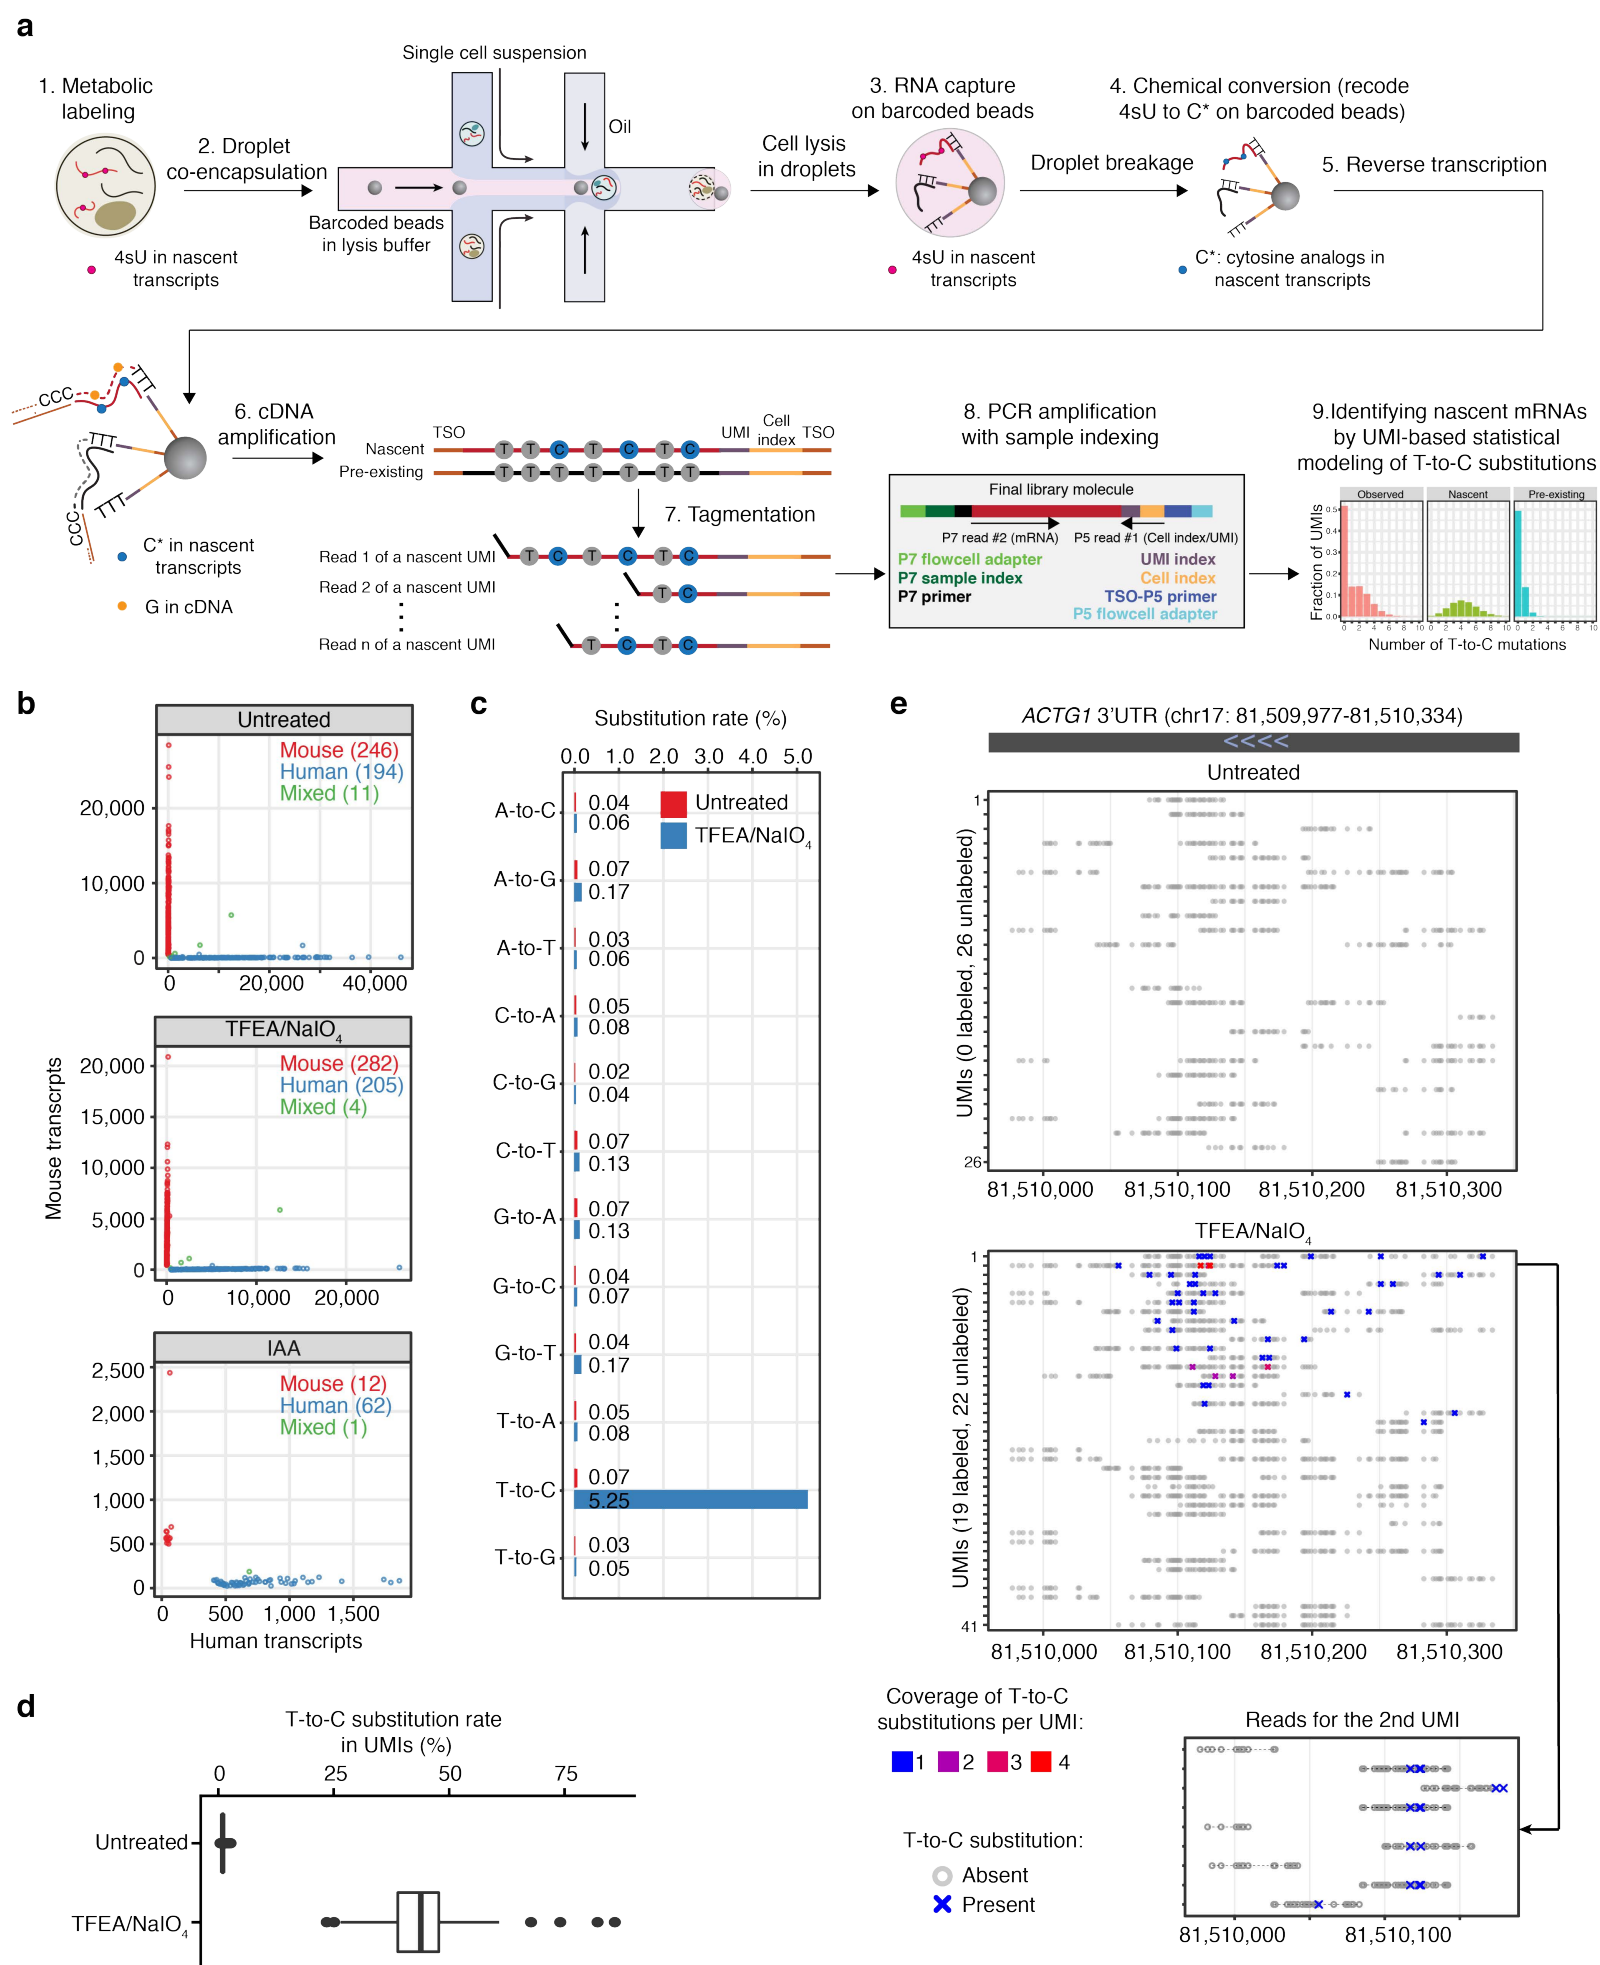

**a**

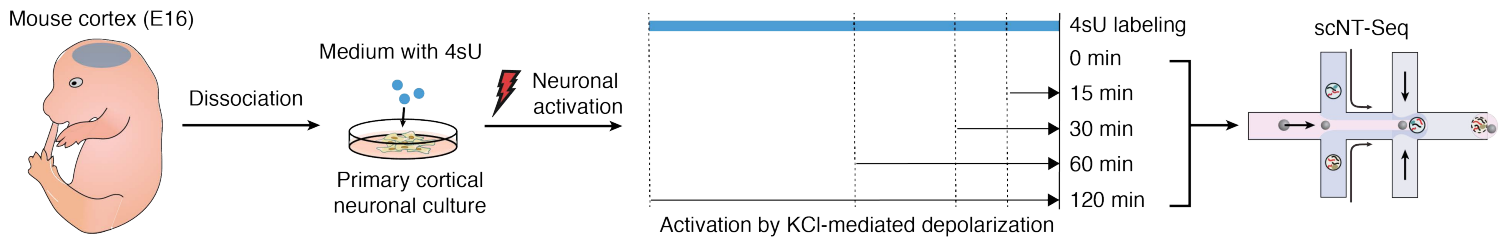

**b**

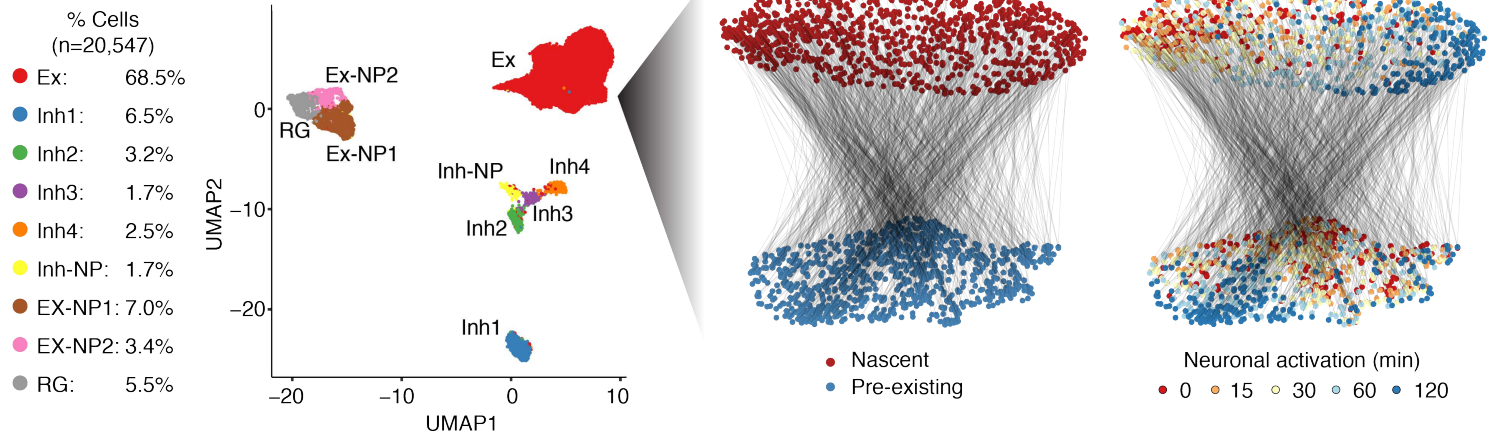

**c**

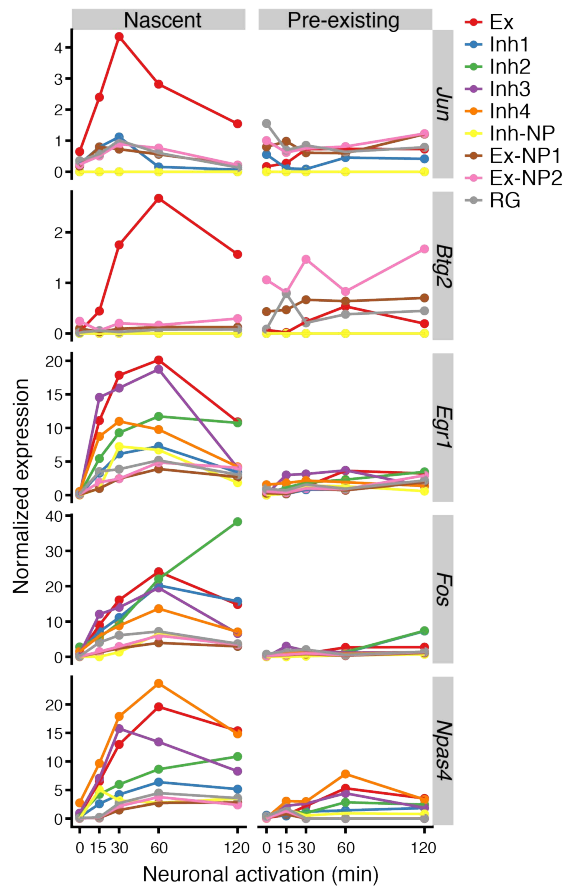

**d**

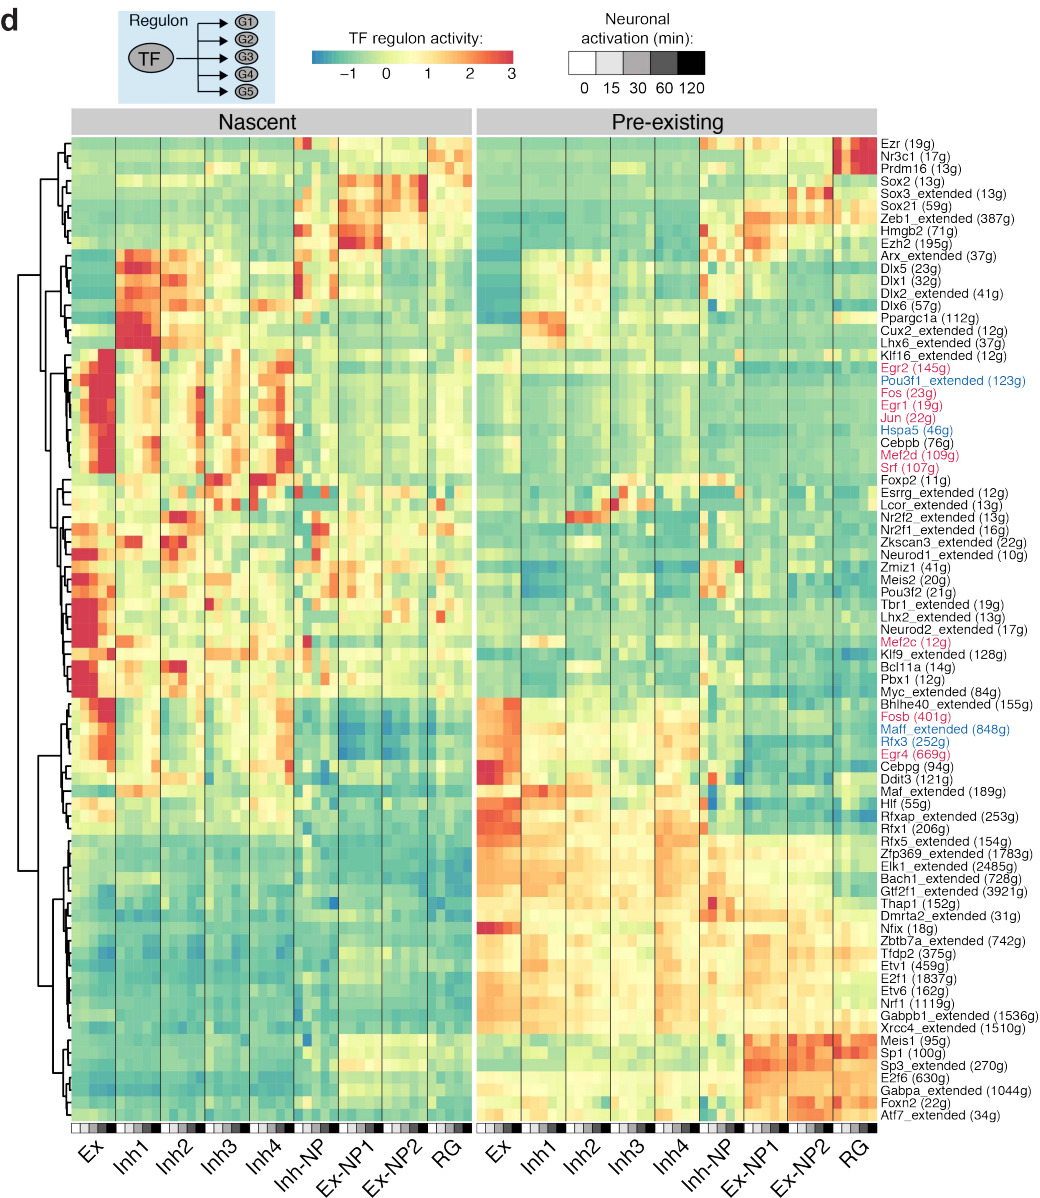



**Figure 3**

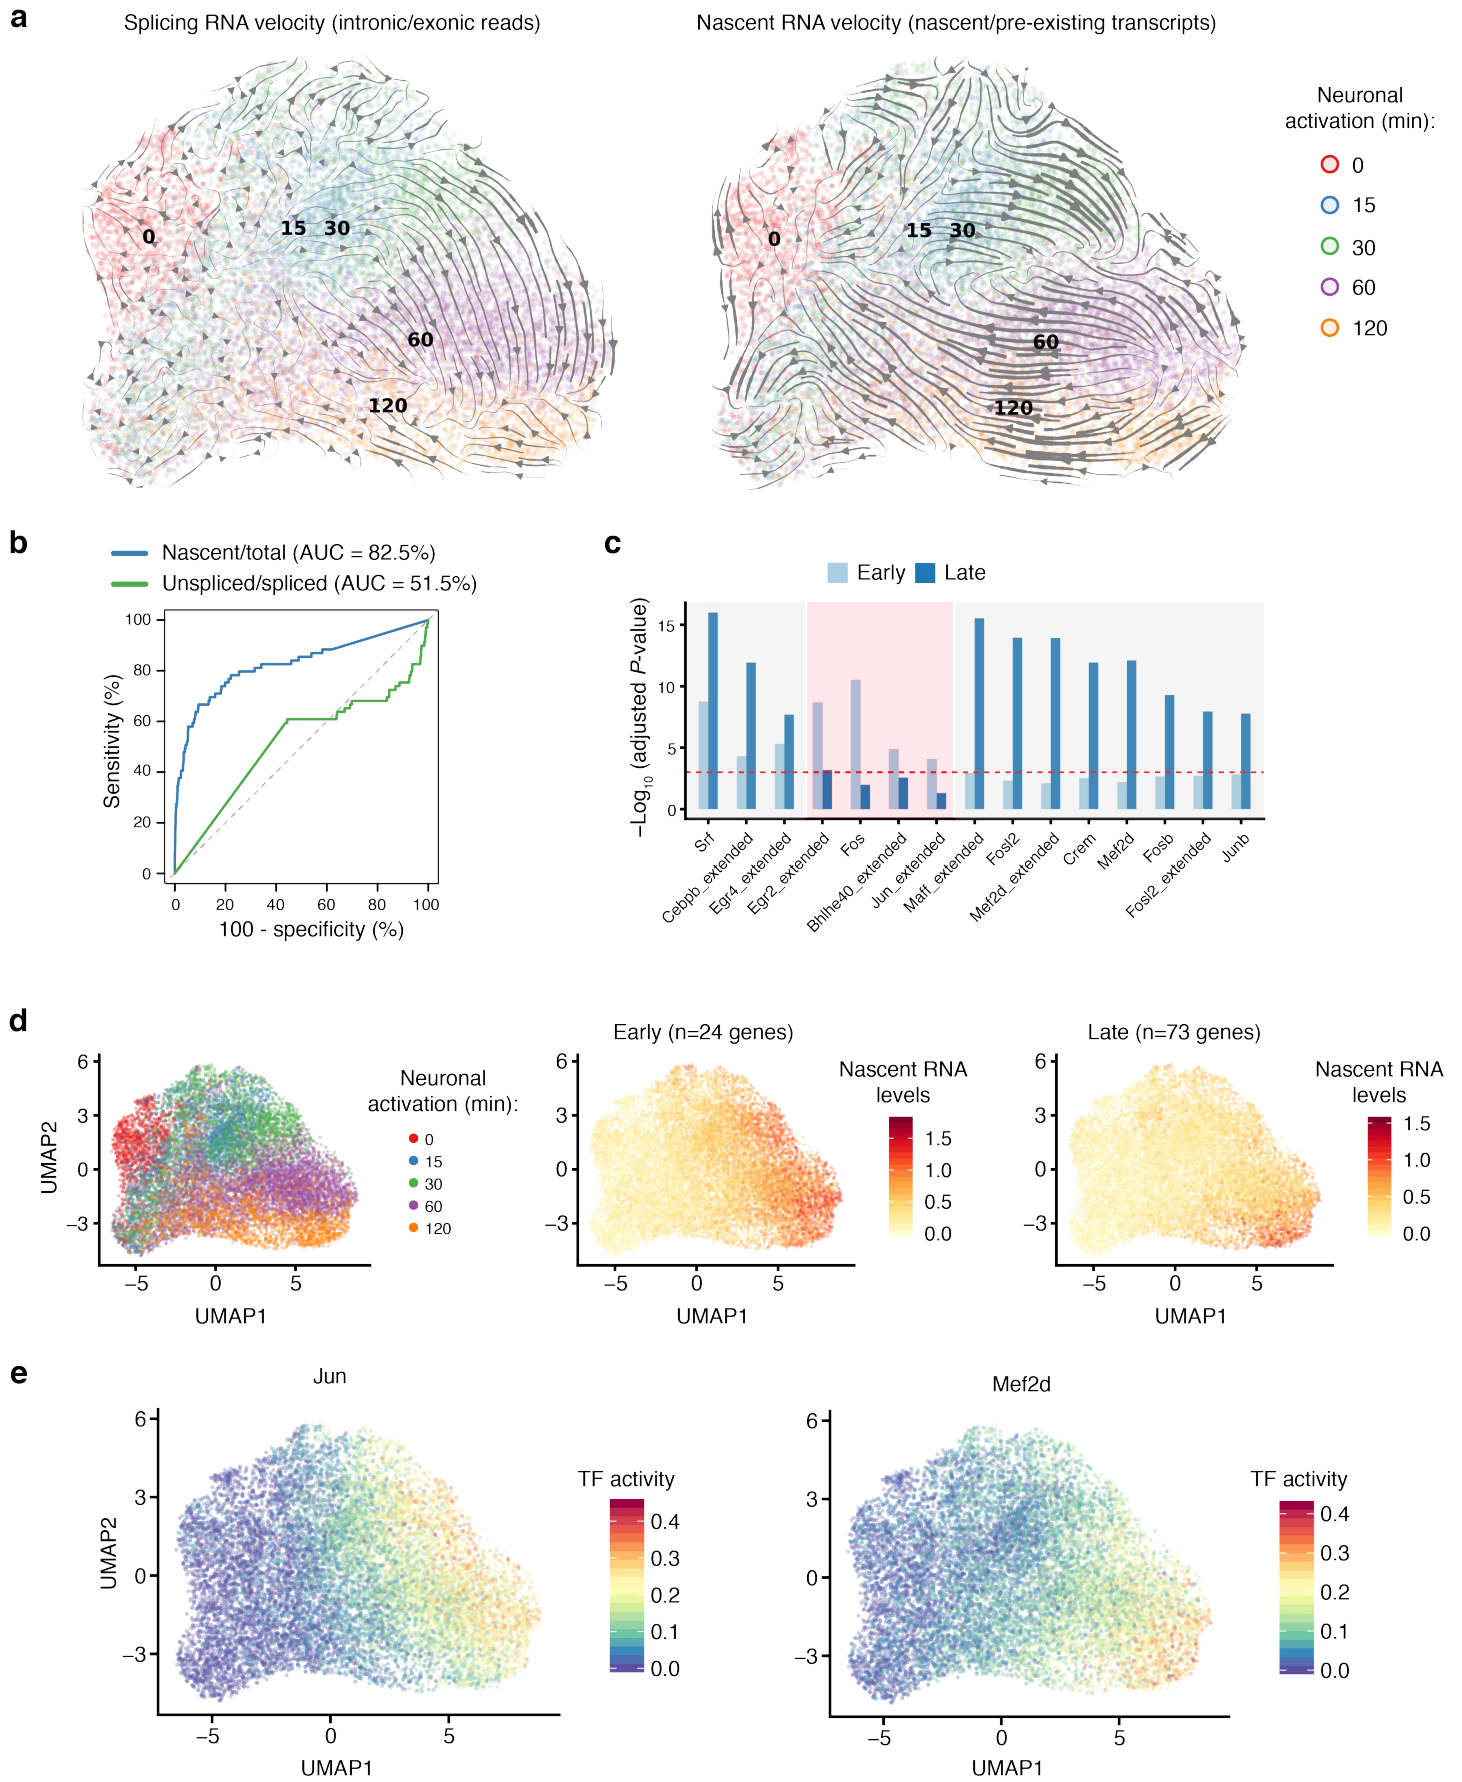

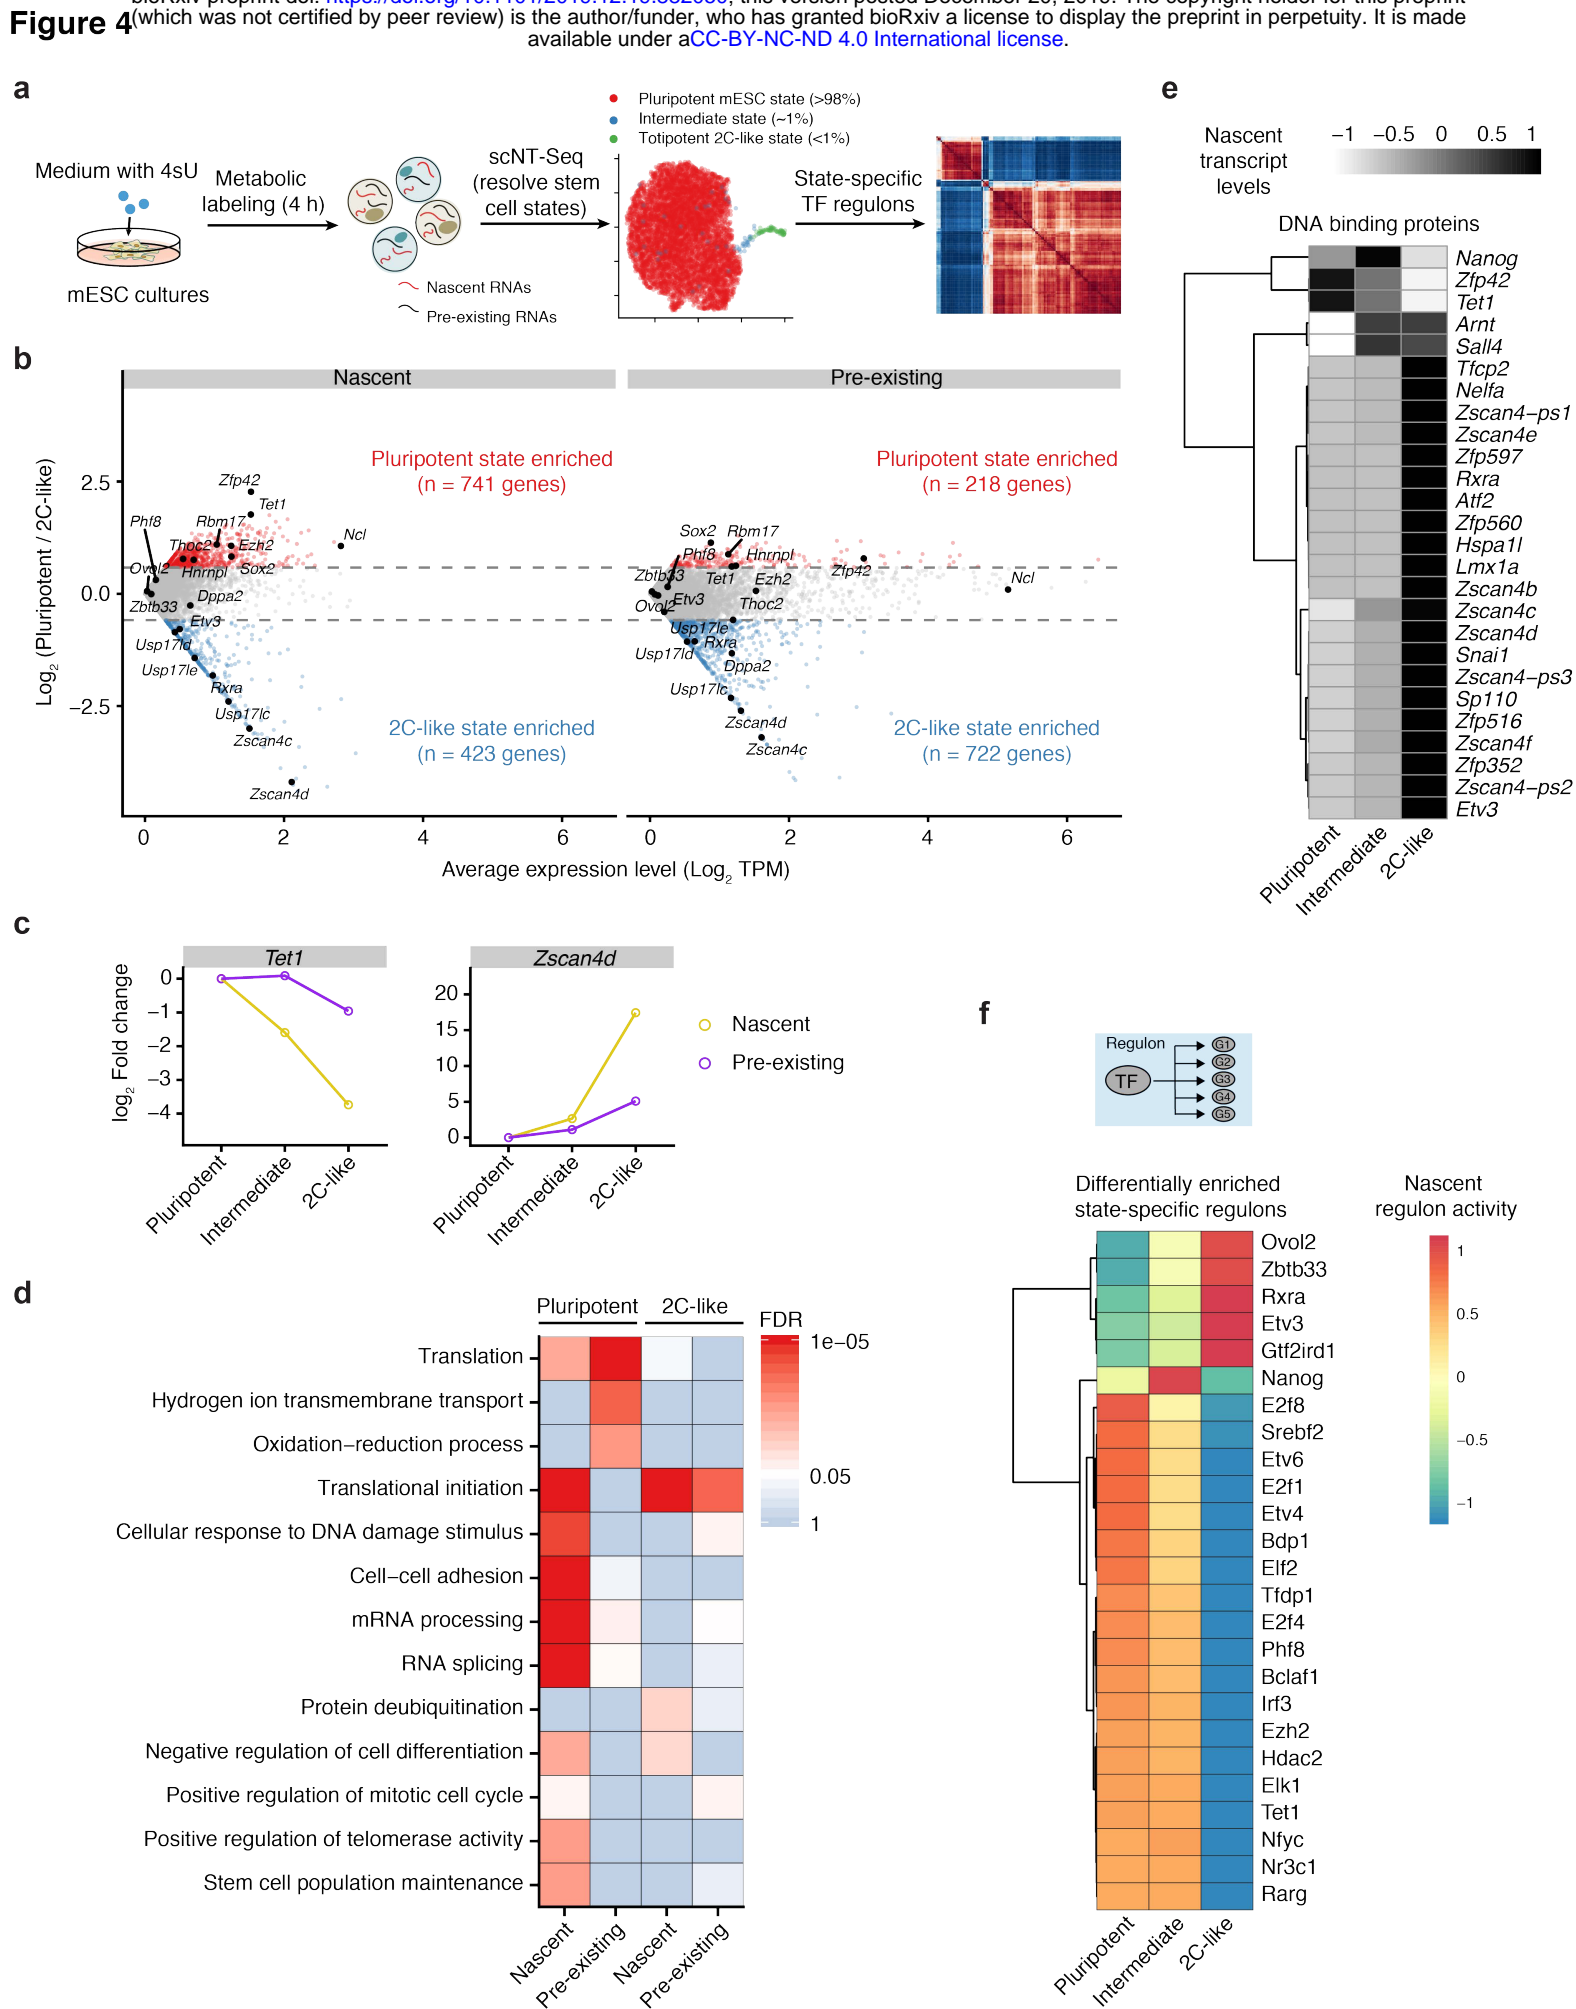



## Figure 5

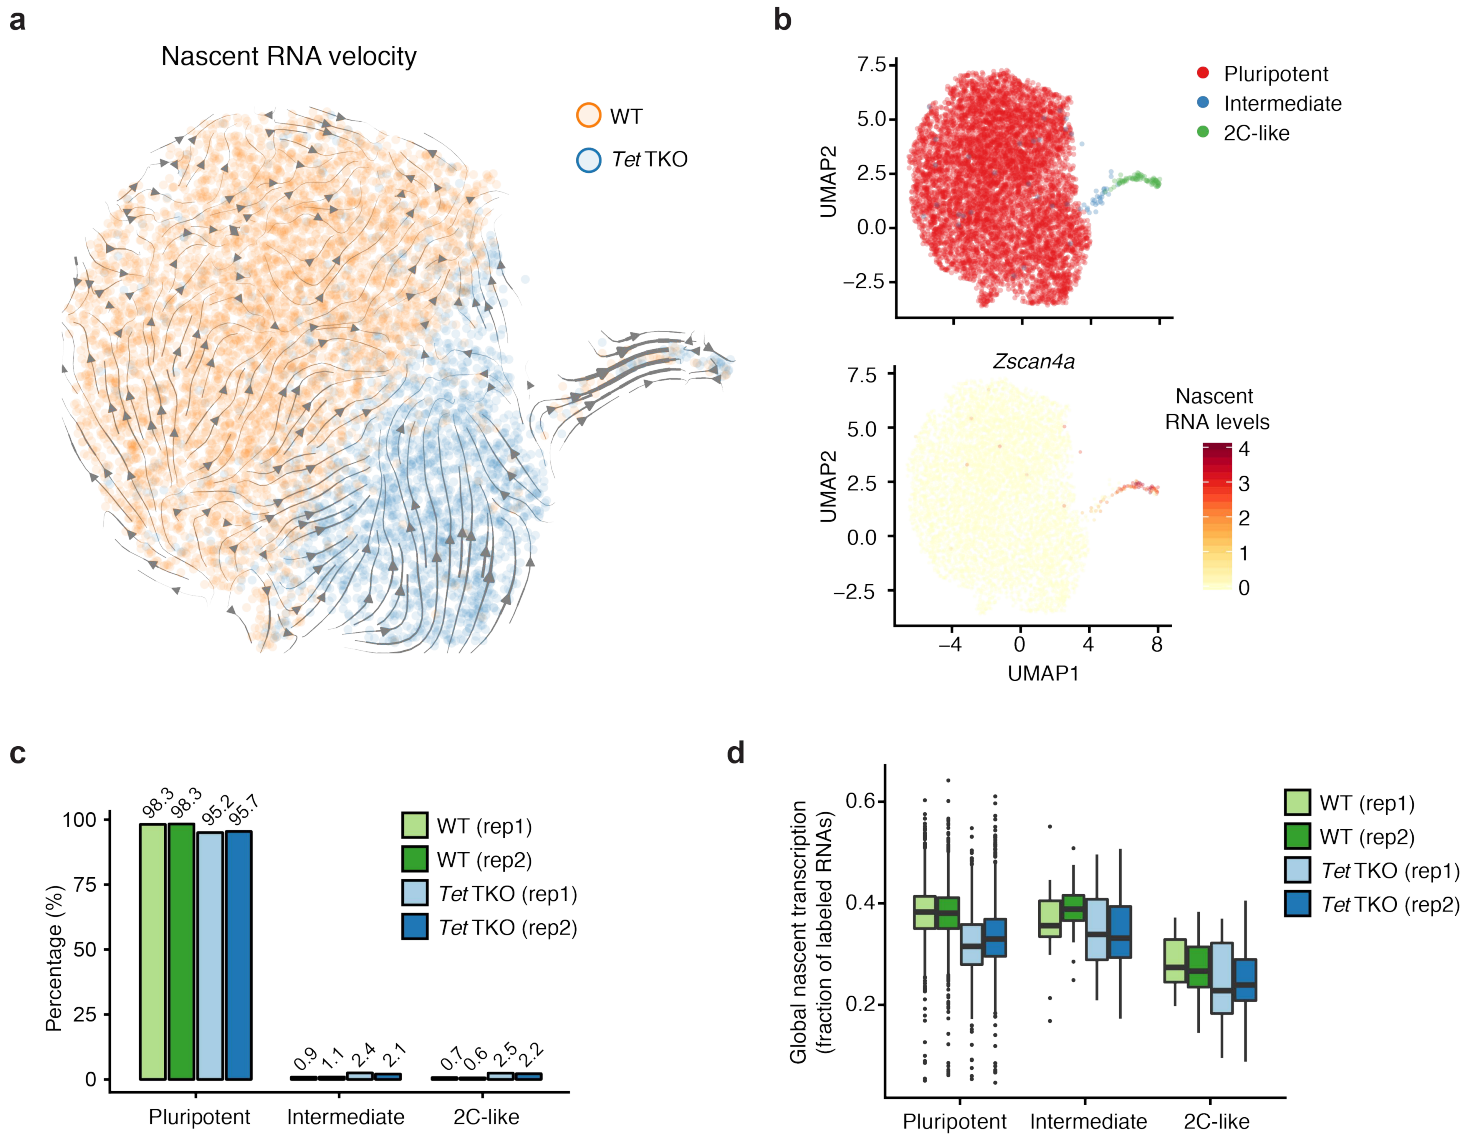

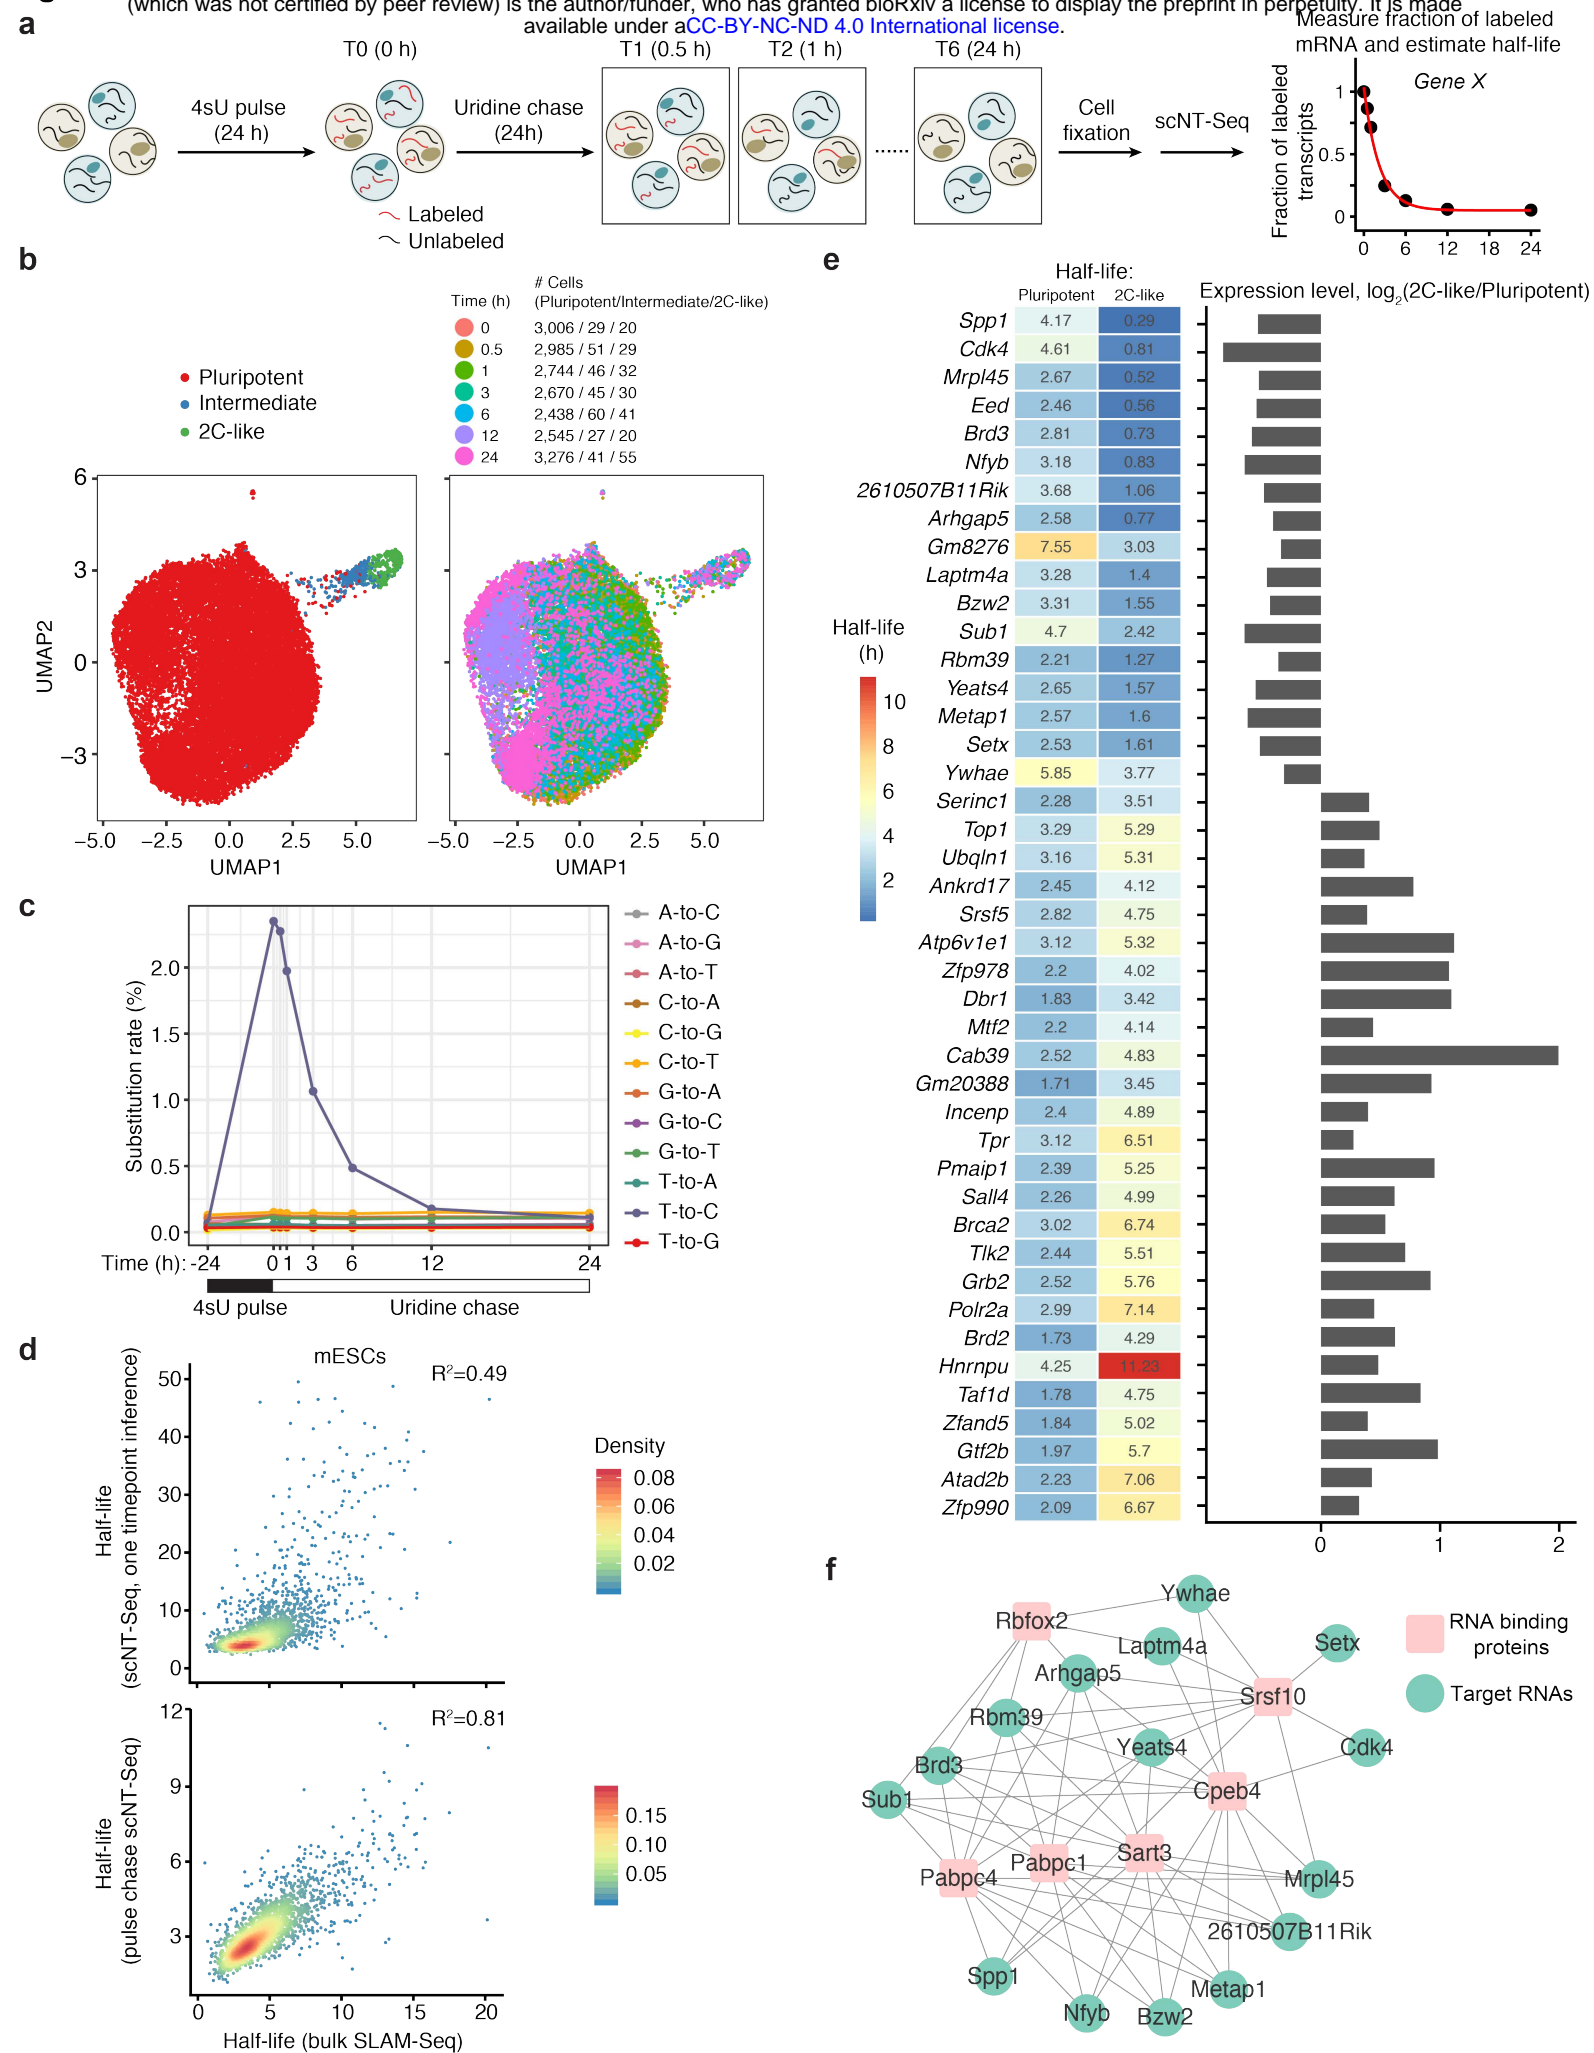

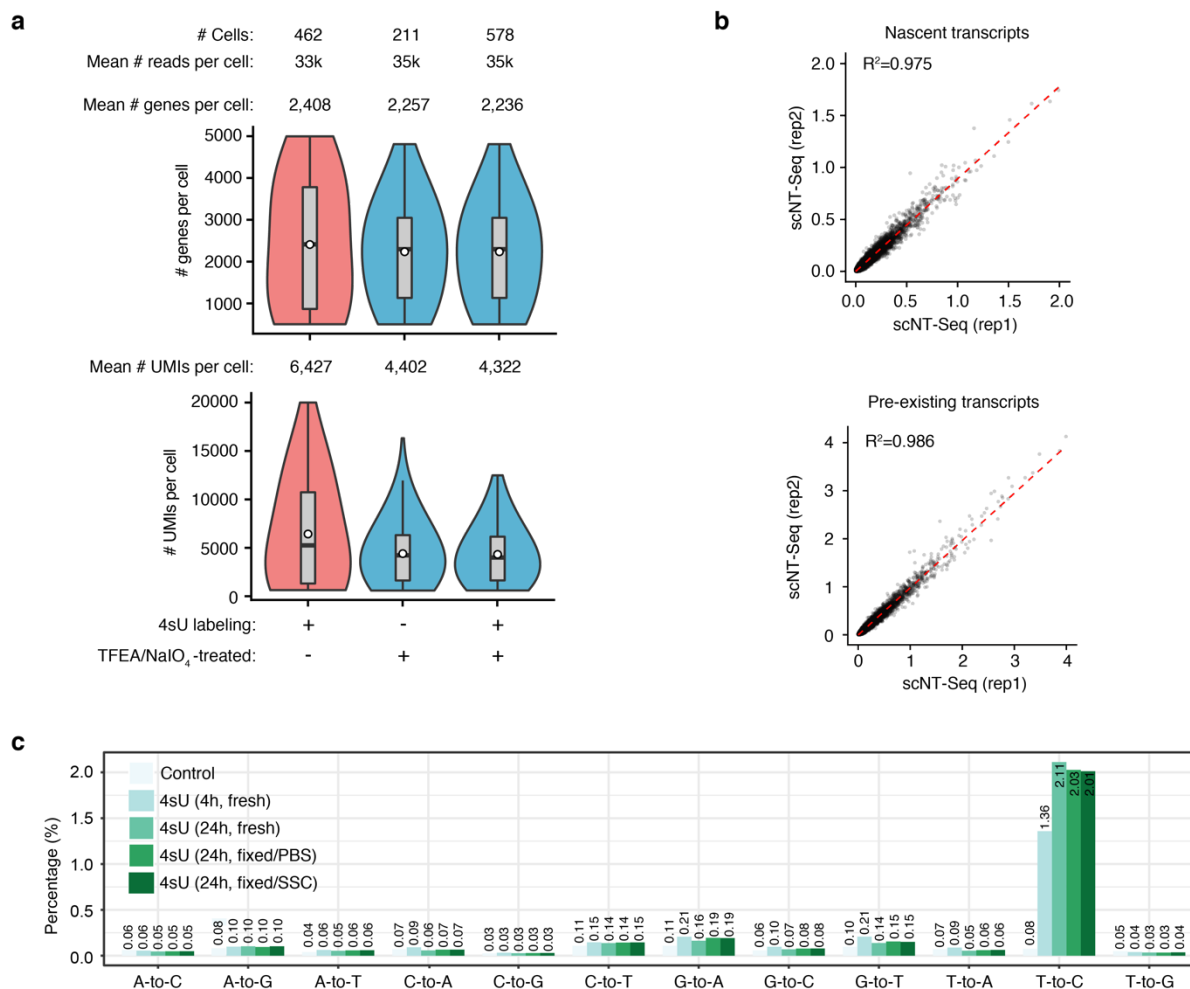

### Supplementary Figure 1: Quality control of scNT-Seq in mESCs.

- a.** Violin plot comparing the number of genes and number of UMIs detected in individual cells among different treatment conditions. Cell number and sequencing depth were shown on the top.
- b.** Scatter plot showing reproducibility between two replicates.
- c.** Transcriptome-wide nucleotide substitution rates reveal the effect of labeling time (100  $\mu$ M 4sU/4hr or 200  $\mu$ M 4sU/24hr) and methanol fixation (two rehydration buffers, PBS versus SSC) on T-to-C conversion rate. The control sample (100  $\mu$ M 4sU/4hr) was not treated with TFEA/NaIO<sub>4</sub>.

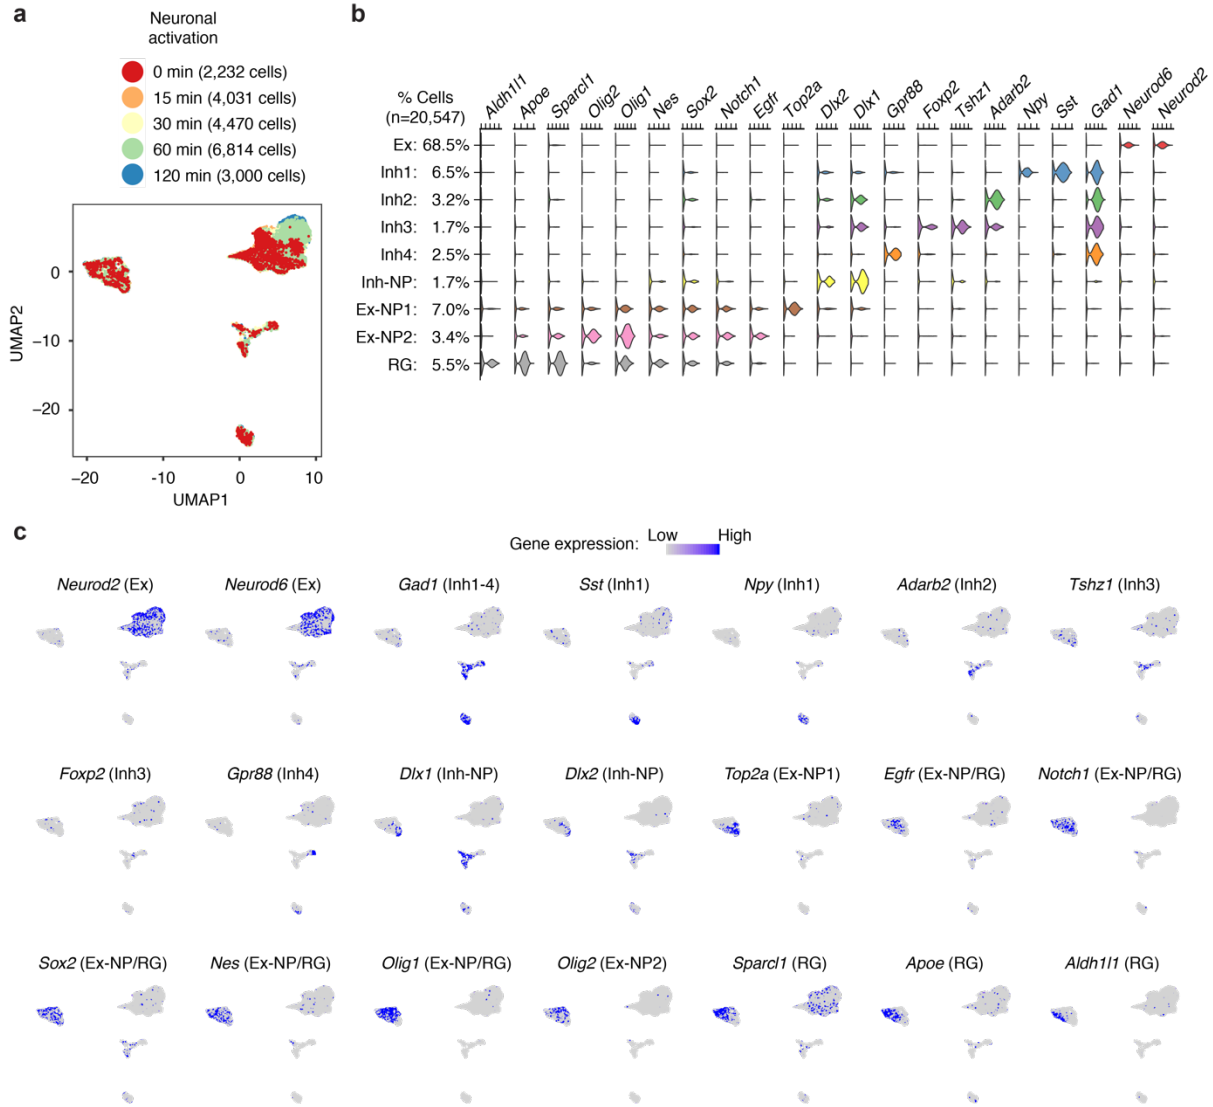

**Supplementary Figure 2: scNT-Seq identifies different cell types in primary mouse cortical cultures.**

- a. UMAP visualization of 20,547 cells from mouse cortical cultures (same UMAP plot as Fig. 2b). The cells are colored by different durations of neuronal activation.
- b. Violin-plot showing gene expression levels of representative marker genes in different cell-types.
- c. Marker gene expression is scaled by colors in the same UMAP as (a). Ex, excitatory neurons; Inh, inhibitory neurons; NP, neural progenitors; RG, radial glial progenitor cells.

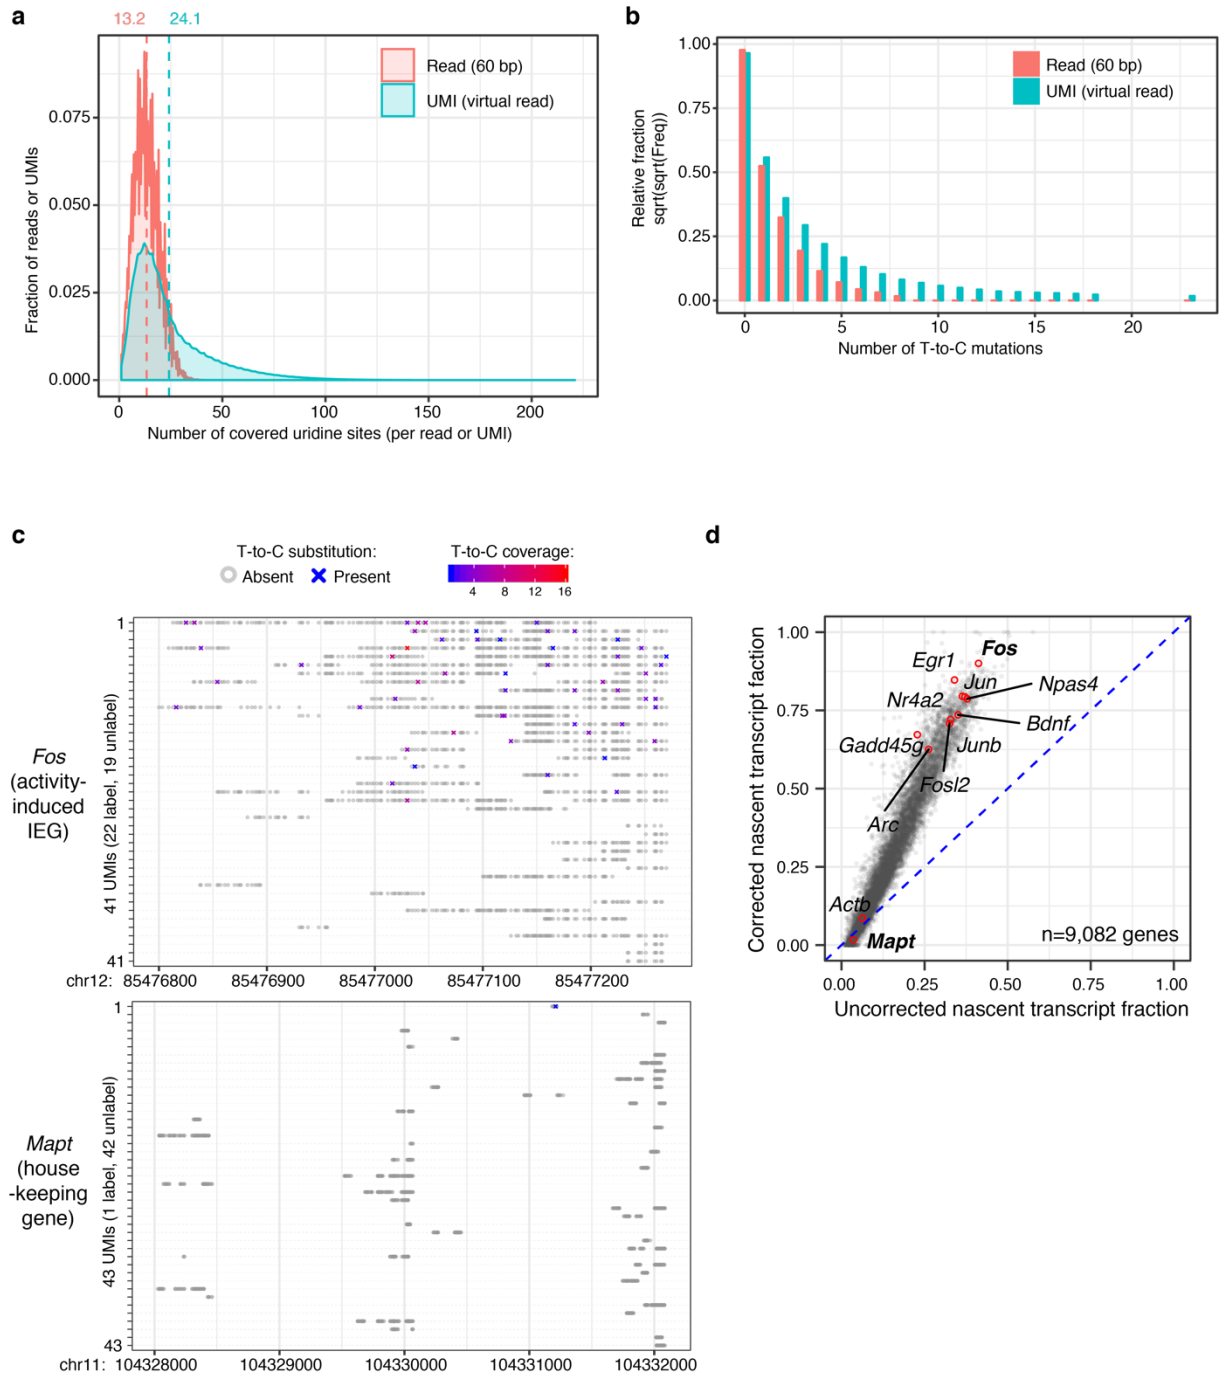

### Supplementary Figure 3: UMI-based statistical correction of the nascent RNA levels.

- Density plot of the number of covered uridine sites per read or UMI. Data set of excitatory neurons with 60 min KCl stimulation were shown.
- Bar plot of the number of T-to-C substitutions per read or UMI. Data set of excitatory neurons with 60 min KCl stimulation were shown.
- All UMIs of the *Fos* and *Mapt* genes from one excitatory neuron with 60 min KCl stimulation were shown. Grey circles stand for T without T-to-C conversion, while crosses ("X"s) denote sites of T-to-C conversion in at least one read.

- d. Comparison of nascent RNA levels of each gene in excitatory neurons (with 60 min KCl stimulation) before and after statistical correction. Ten neuron activity-dependent genes and two house-keeping genes are highlighted with red dots.



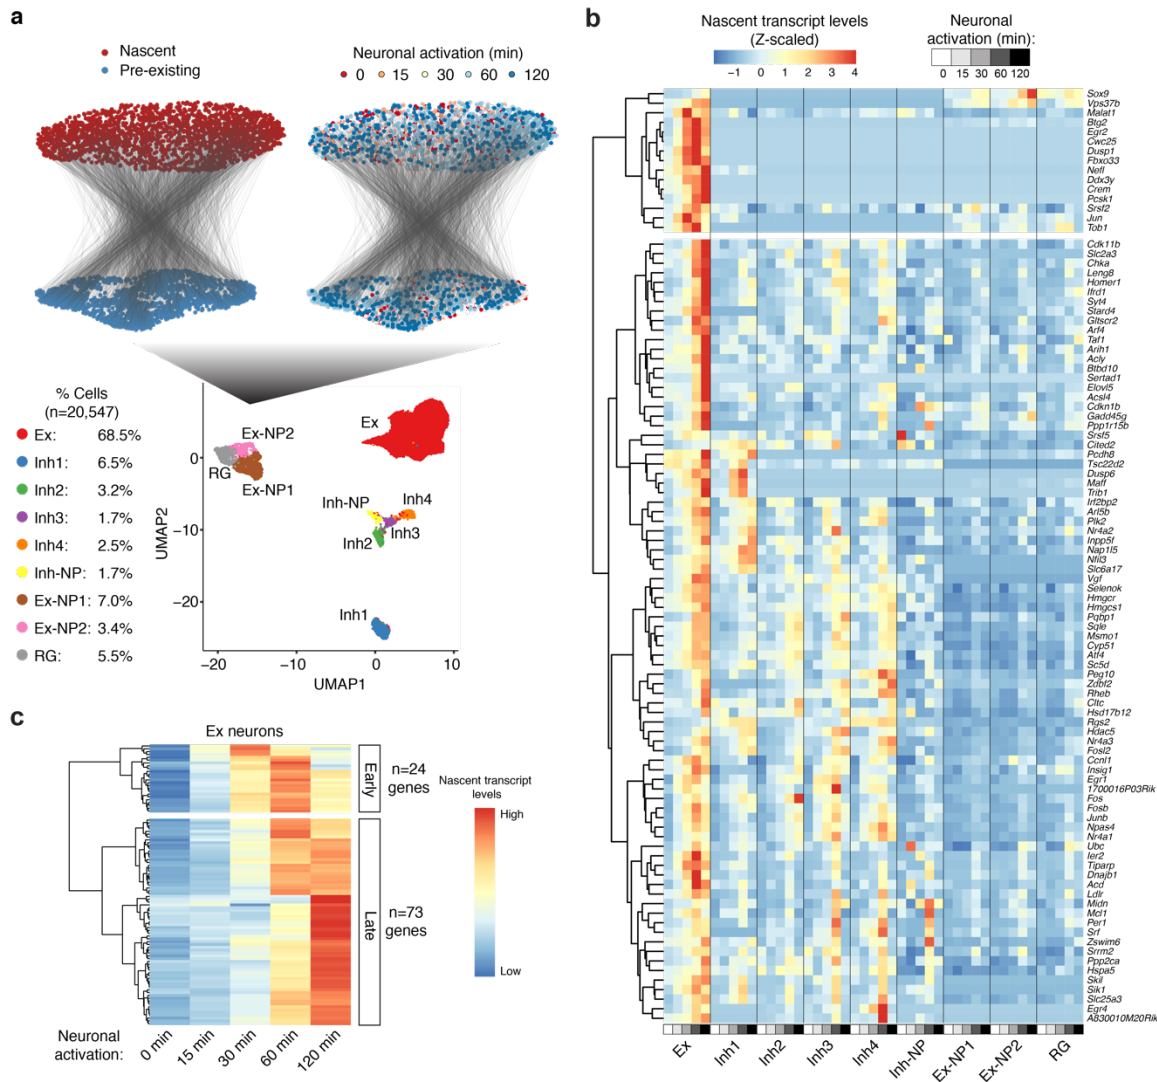

### Supplementary Figure 4: Different cell types show different neuron activity-dependent gene expression programs.

- UMAP visualization of the expression profiles of 20,547 cells from primary mouse cortical cultures with or without KCl stimulation (bottom panel, same UMAP plot as Figure 2b). Cells from non-neuronal cell clusters (RG/Ex-NP) are sub-clustered based on nascent or pre-existing mRNAs (top). The nascent and pre-existing mRNAs of same cell were connected by black line. Ex, excitatory neurons; Inh, inhibitory neurons; NP, neural progenitors; RG, radial glial progenitor cells.
- Heat map showing nascent transcript levels of genes with significantly increased expression level after KCl stimulation in at least one cell type.
- Heat map showing nascent transcript levels of early- and late-response genes in excitatory neurons with different durations of KCl stimulation. 97 significantly induced genes were clustered into 2 groups (early- and late-response).

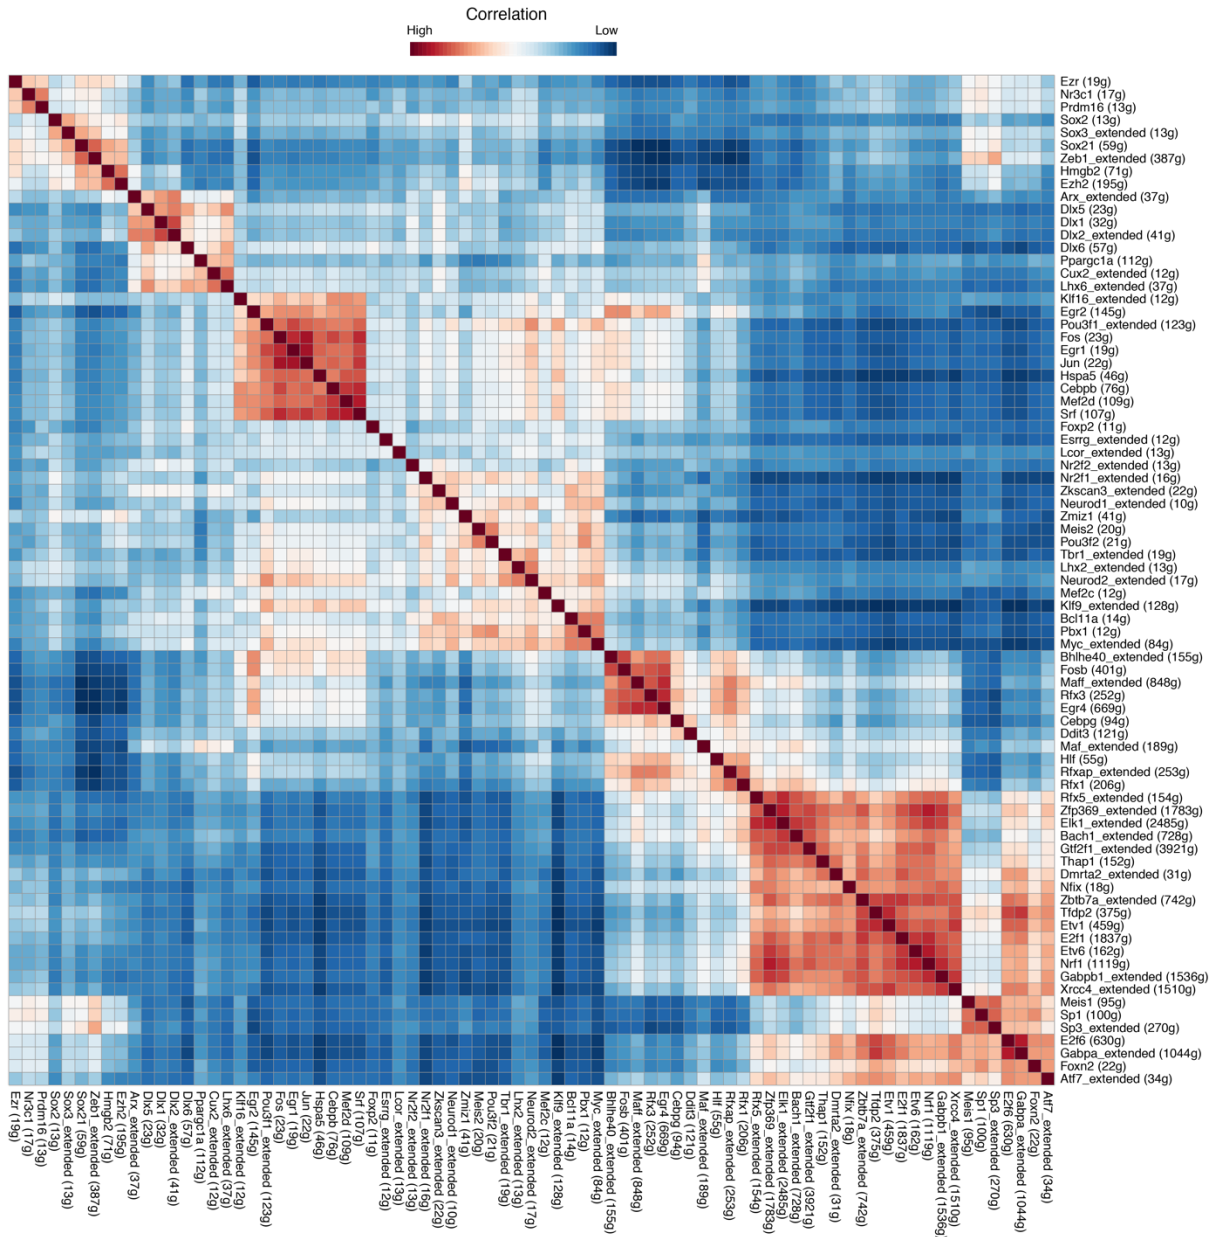

### Supplementary Figure 5: Heat map of activity-regulated TF regulons in mouse cortical cultures.

Heat map showing correlated transcription factor activity (quantified by SCENIC) during neuronal activity-dependent gene expression.

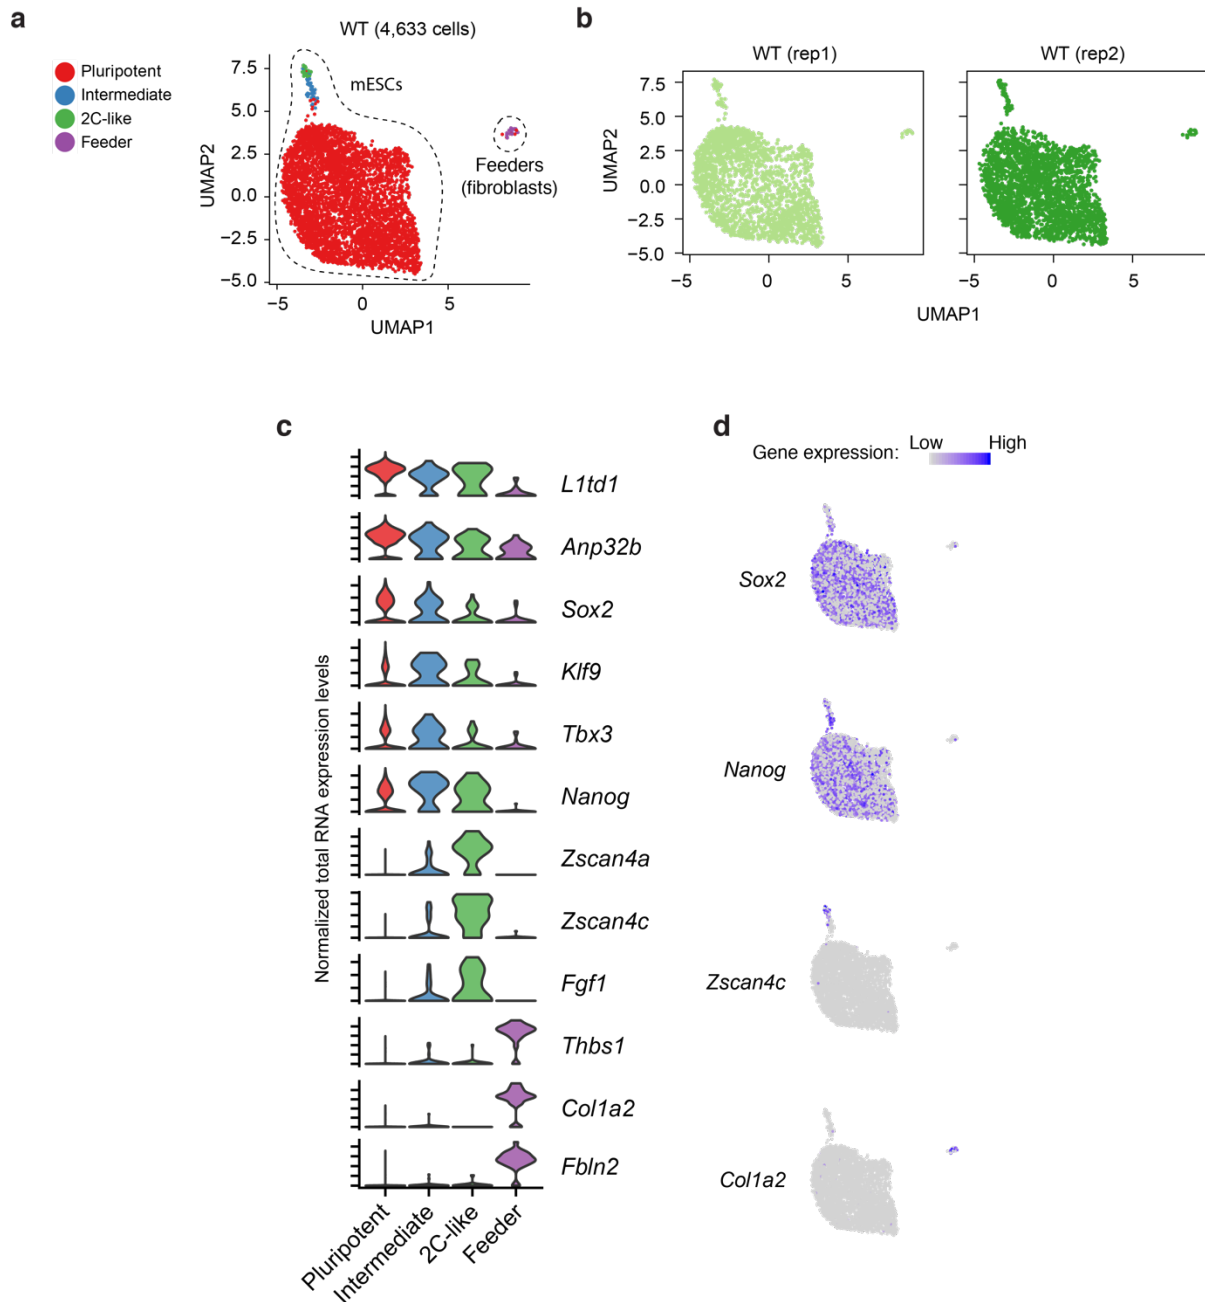

**Supplementary Figure 6: scNT-Seq reveals different stem cell states in mESC cultures.**

- UMAP visualization of 4,633 WT mESCs from two replicates. The cells are colored by different cell-types or cell-states. Feeders (purple dots) are contaminated mouse embryonic fibroblasts in cell culture.
- UMAP plots were colored by replicate.
- Violin plot showing gene expression level of marker genes in different stem cell states or cell-types.
- Feature-plots showing marker gene expression is scaled by colors in the same UMAP as (a).

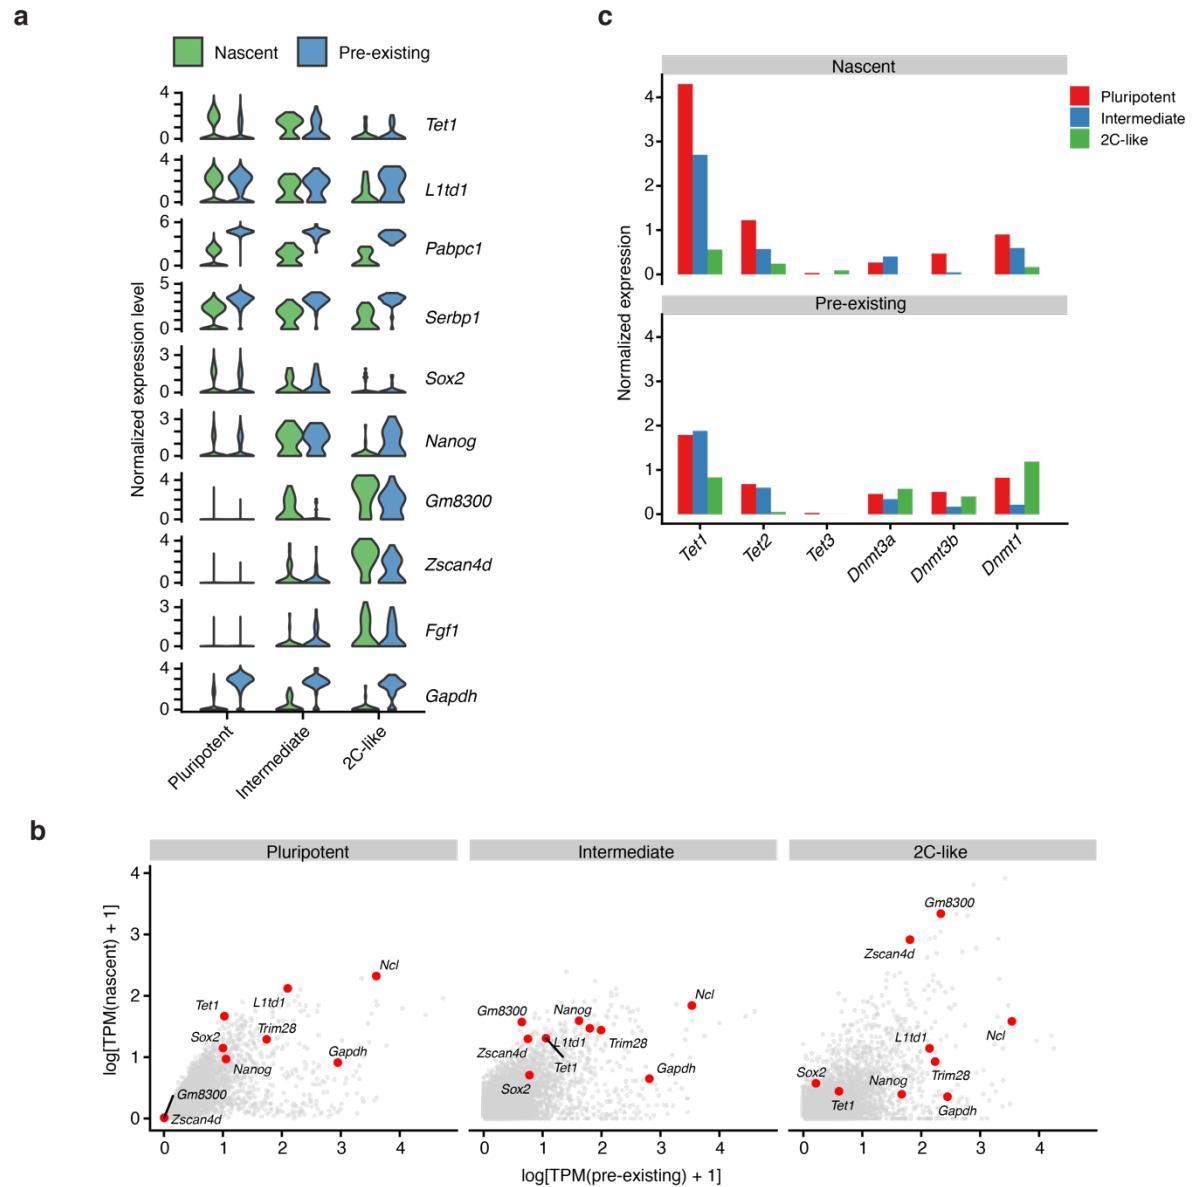

**Supplementary Figure 7: scNT-Seq reveals nascent and pre-existing RNA level of representative genes in mESCs.**

- Violin plots showing expression levels of nascent and pre-existing transcripts of selected genes in three cell-states of mESCs.
- Scatterplots showing nascent and pre-existing RNA levels of representative genes, including pluripotent genes (*Sox2*, *Nanog*), 2C-like state specific genes (*Zscan4d*, *Gm8300*), and house-keeping gene (*Gapdh*).
- Nascent and pre-existing RNA levels of major DNA methylators in three stem cell states.

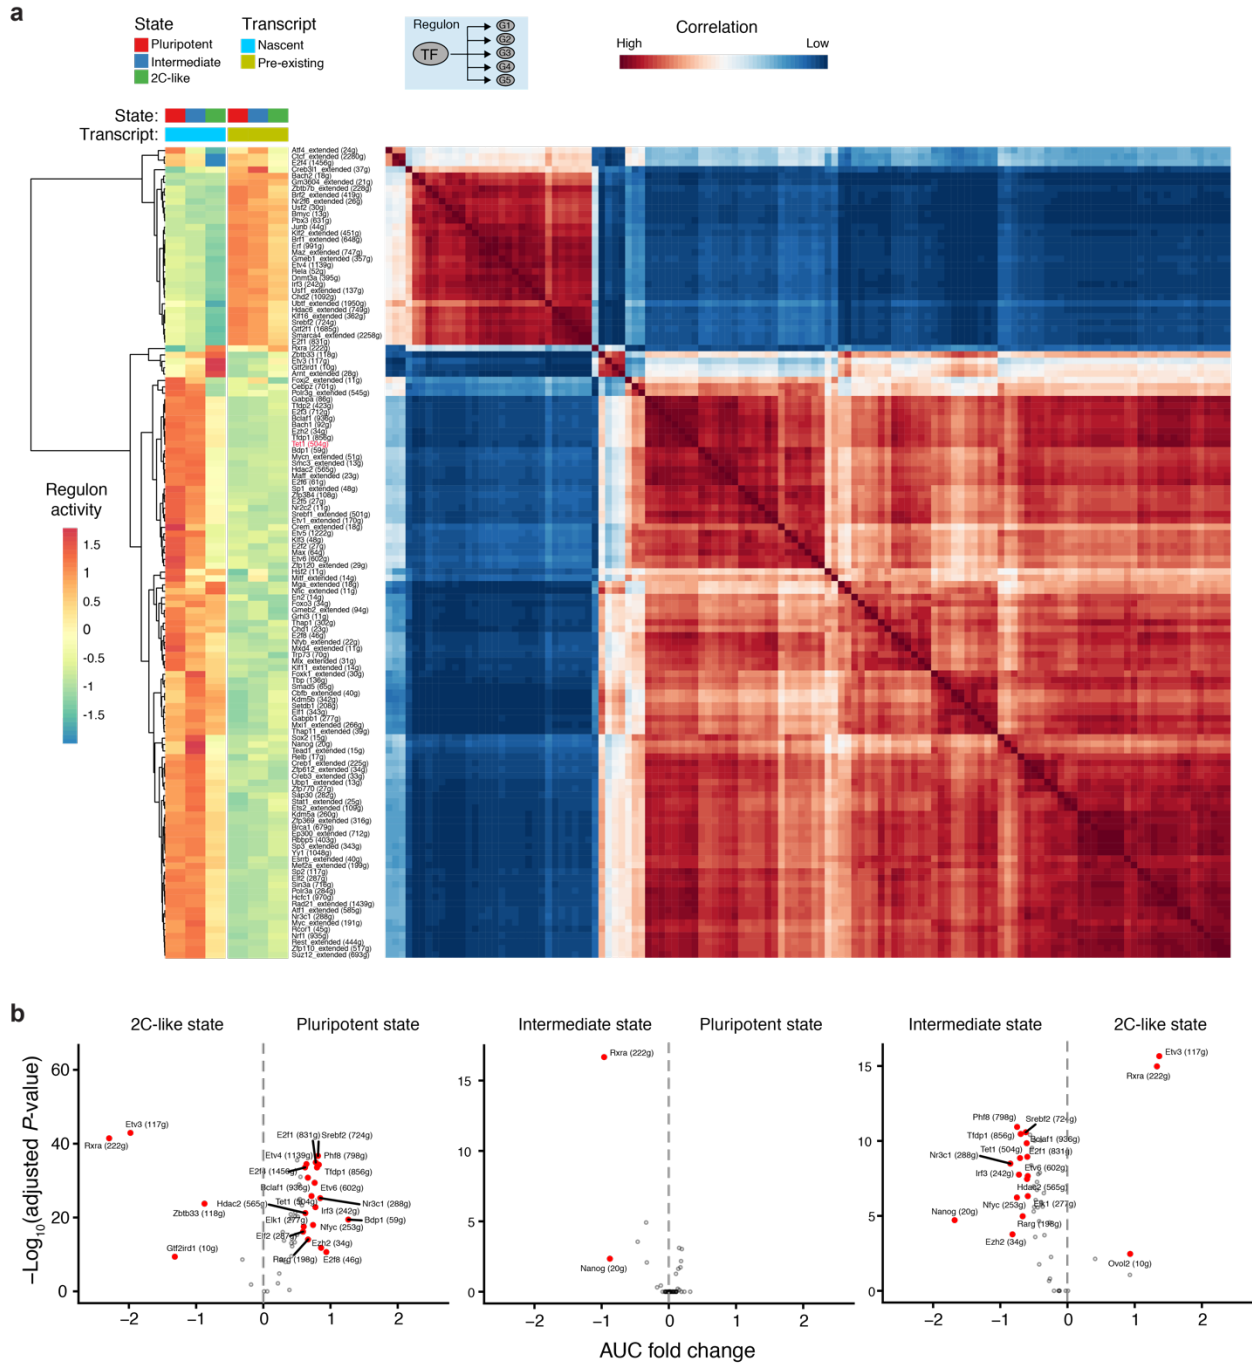

**Supplementary Figure 8: scNT-Seq reveals TF activity changes during pluripotent-to-2C transition in mESCs.**

- Heat maps showing TF regulon activity (left) and the similarity of transcription factors activities in three stem cell states (right).
- Volcano-plot showing state-specific TF regulon activity. TFs with a fold-change of mean AUC values more than 1.5 and adjust  $P$ -value less than 0.05 were highlighted in red.







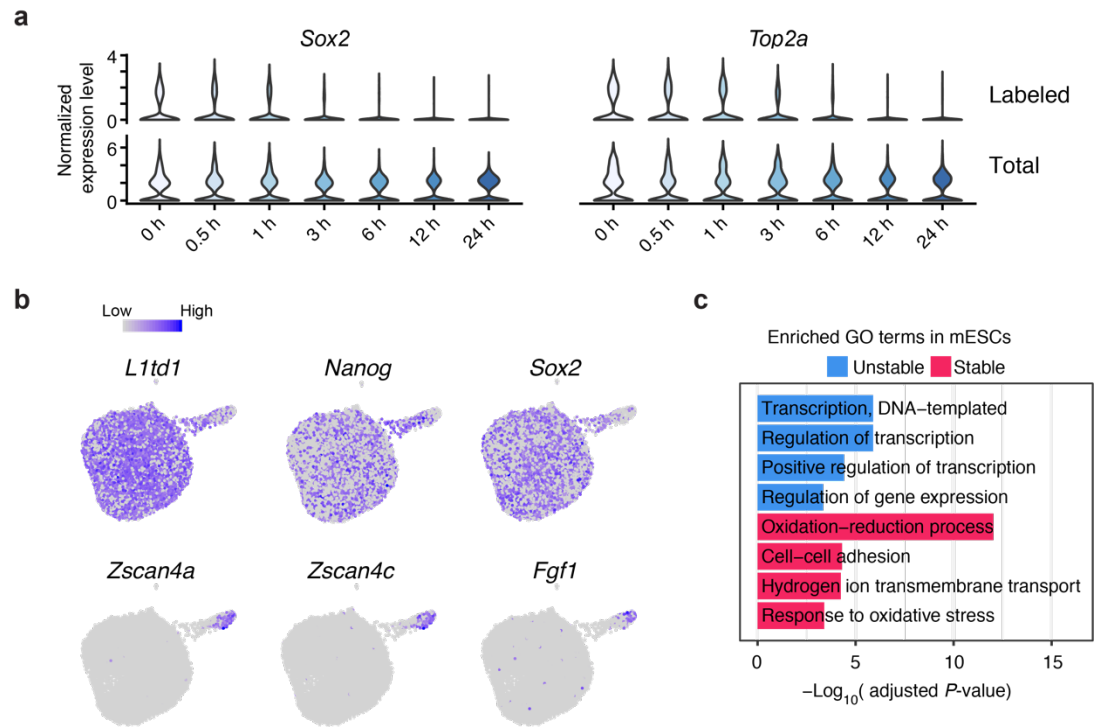

**Supplementary Figure 10: Pulse-chase scNT-Seq reveals transcript-specific mRNA decay of mESCs.**

- Violin plots showing levels of labeled and total transcripts of the *Sox2* and *Top2a* genes during pulse-chase assay.
- Marker gene expression is scaled by colors in the same UMAP plot as Fig. 6b.
- Enrichment analysis of GO terms within stable (top 10% genes with longest half-lives) and unstable genes (top 10% genes with shortest half-life) in pluripotent state mESCs.

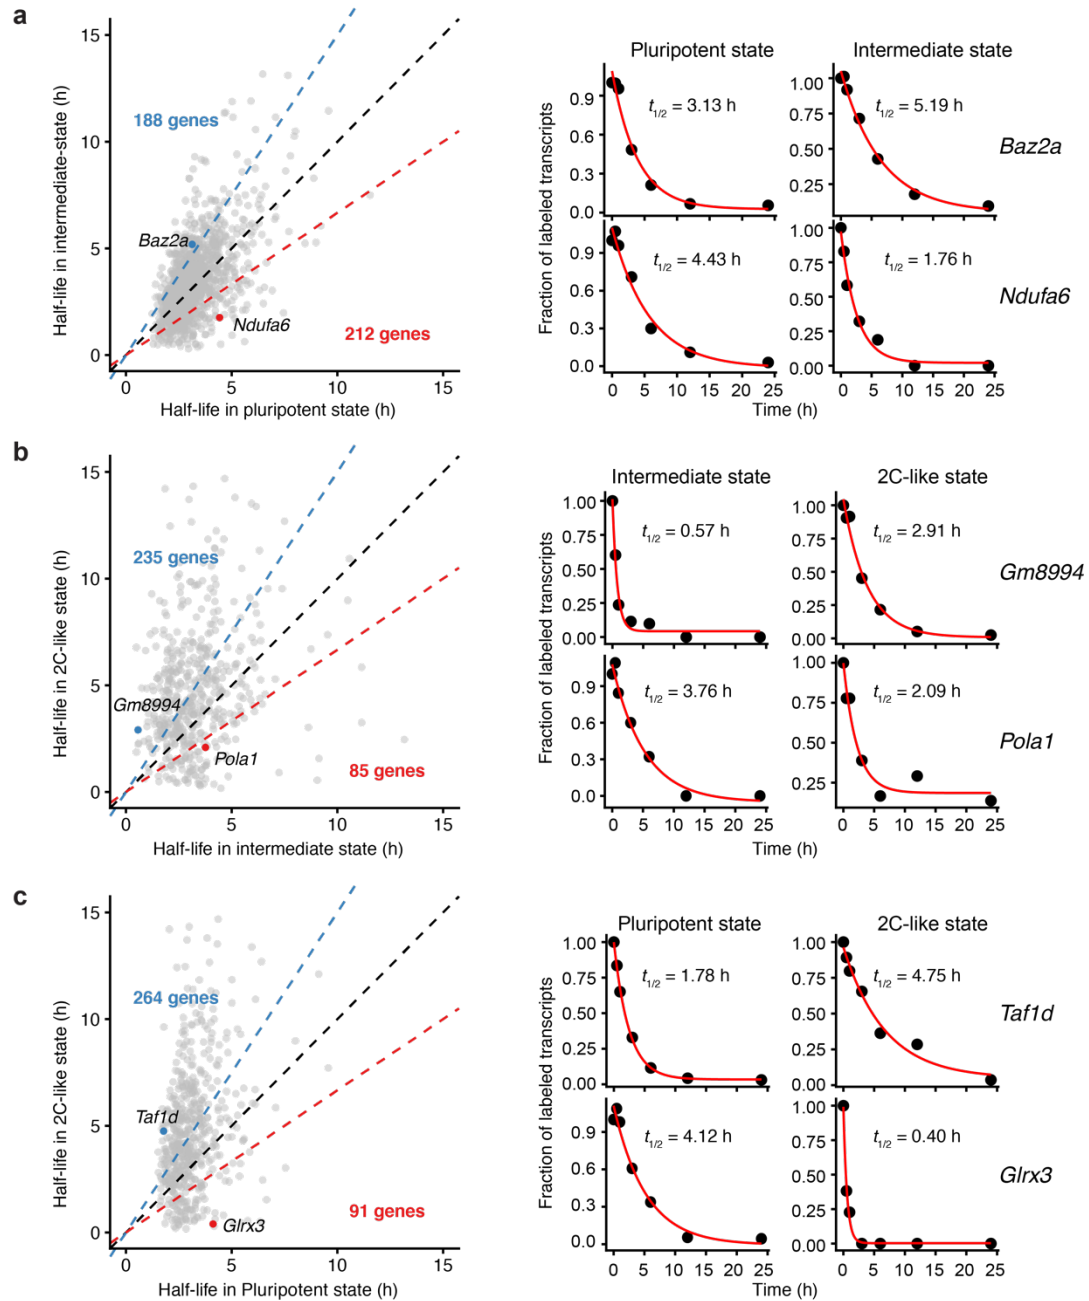

### Supplementary Figure 11: Pulse-chase scNT-Seq reveals cell state-specific mRNA decay in mESCs.

Scatterplots comparing the RNA half-life of commonly detected transcripts between two stem cell states (**a**: pluripotent vs. intermediate; **b**: intermediate vs. 2C; **c**: pluripotent vs. 2C) and number of genes showing >1.5-fold change in RNA half-life (indicated by blue and red dashed line) between two states are shown (left panels). Representative genes showing state-specific RNA half-life are shown in the right panels.

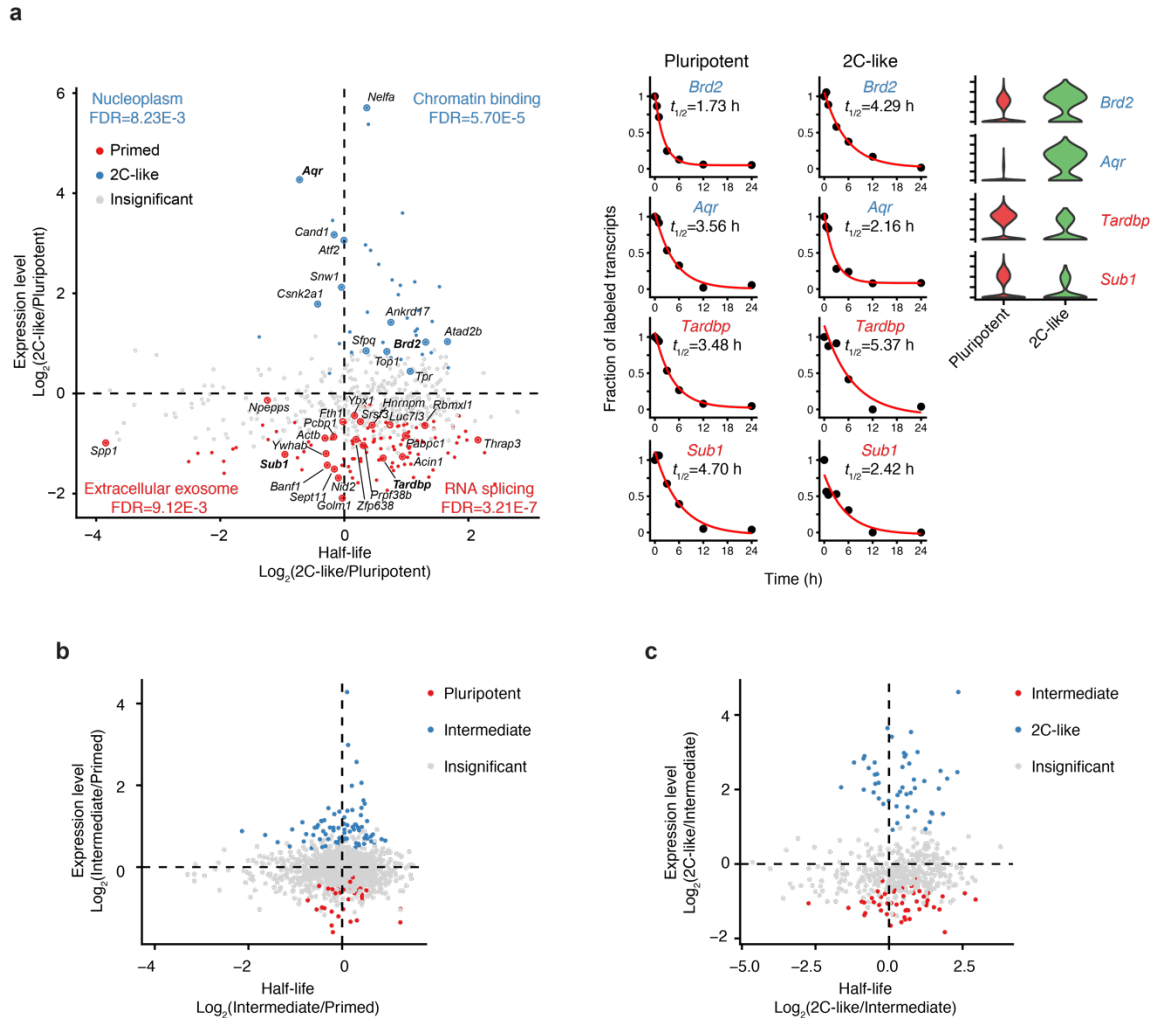

**Supplementary Figure 12: Characterization of mRNA stability and gene expression levels in different states of mESCs.**

- a.** Scatterplot showing the correlation between gene expression levels (total transcripts) and RNA half-life in pluripotent and 2C-like states. Representative GO terms enriched in genes in each quadrant, as well as genes belong to these GO terms, are highlighted. The mRNA decay kinetics and expression level of selected 4 genes were also shown in the middle panel. Representative state-specific genes with different RNA half-life are shown in the right panel. 2C-like state enriched genes are highlighted in blue, while genes preferentially expressed in the pluripotent state are highlighted in red.
- b-c.** Scatterplot showing the correlation between gene expression levels (total transcripts) and RNA half-life in different states (b: Pluripotent vs. intermediate; c: intermediate vs. 2C-like). Genes that are differentially expressed in one stem cell state are highlighted in red or blue.
